# Supplementary material
Source: PubMed Central journal article supplement (PMC5798888)
Supplement: NIHMS937940-supplement-4.pdf [file NIHMS937940-supplement-4.pdf]

## Glutamatergic Tuning of Hyperactive Striatal Projection Neurons Controls the Motor Response to Dopamine Replacement in Parkinsonian Primates

### Graphical Abstract

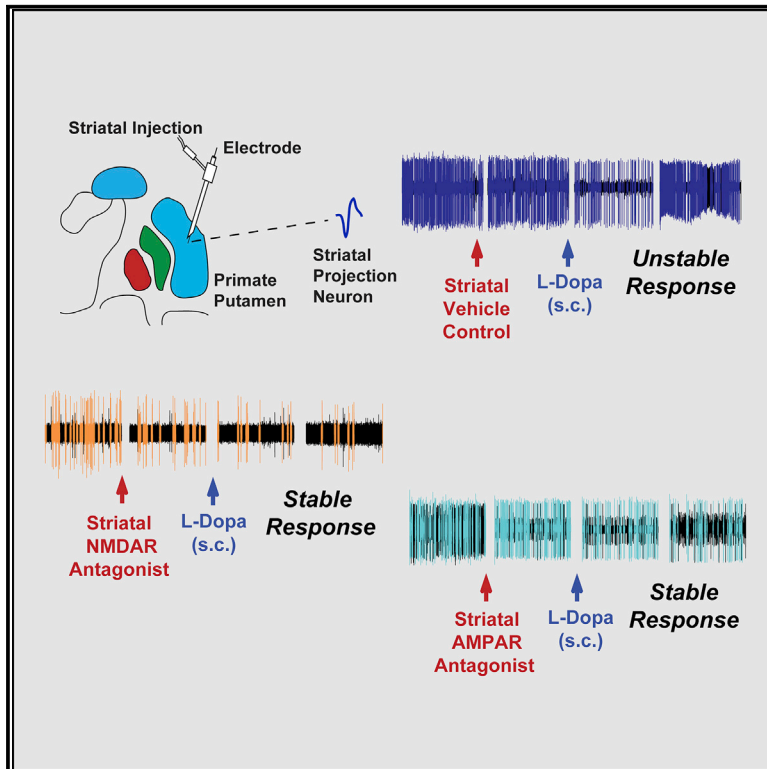

### Authors

Arun Singh, Meagan A. Jenkins, Kenneth J. Burke, Jr., ..., Annalisa Scimemi, Stephen F. Traynelis, Stella M. Papa

### Correspondence

spapa@emory.edu

### In Brief

Singh et al. analyze the role of SPN hyperactivity in abnormal responses to dopamine replacement in parkinsonian primates with selective local blockade of glutamate signaling. Lowering basal firing stabilizes the SPN response to dopamine and normalizes motor responses.

### Highlights

- Selectively reducing AMPAR or NMDAR transmission stabilizes SPN responses to DA
- Reduced glutamate signaling stabilizes DA-induced activity increases and decreases
- Reduced glutamate signaling across SPNs suppresses dyskinesias in primates
- Data support the mechanistic role of SPN hyperactivity in responses to DA in PD

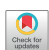

# Glutamatergic Tuning of Hyperactive Striatal Projection Neurons Controls the Motor Response to Dopamine Replacement in Parkinsonian Primates

Arun Singh,<sup>1</sup> Meagan A. Jenkins,<sup>2</sup> Kenneth J. Burke, Jr.,<sup>1</sup> Goichi Beck,<sup>1</sup> Andrew Jenkins,<sup>2,3</sup> Annalisa Scimemi,<sup>4</sup> Stephen F. Traynelis,<sup>2</sup> and Stella M. Papa<sup>1,5,6,\*</sup>

<sup>1</sup>Yerkes National Primate Research Center, Emory University School of Medicine, Atlanta, GA 30329, USA

<sup>2</sup>Department of Pharmacology, Emory University School of Medicine, Atlanta, GA 30322, USA

<sup>3</sup>Department of Anesthesiology, Emory University School of Medicine, Atlanta, GA 30322, USA

<sup>4</sup>Department of Biology, State University of New York, Albany, NY 12222, USA

<sup>5</sup>Department of Neurology, Emory University School of Medicine, Atlanta, GA 30329, USA

<sup>6</sup>Lead Contact

\*Correspondence: [spapa@emory.edu](mailto:spapa@emory.edu)

<https://doi.org/10.1016/j.celrep.2017.12.095>

## SUMMARY

Dopamine (DA) loss in Parkinson's disease (PD) alters the function of striatal projection neurons (SPNs) and causes motor deficits, but DA replacement can induce further abnormalities. A key pathological change in animal models and patients is SPN hyperactivity; however, the role of glutamate in altered DA responses remains elusive. We tested the effect of locally applied AMPAR or NMDAR antagonists on glutamatergic signaling in SPNs of parkinsonian primates. Following a reduction in basal hyperactivity by antagonists at either receptor, DA inputs induced SPN firing changes that were stable during the entire motor response, in clear contrast with the typically unstable effects. The SPN activity reduction over an extended putamenal area controlled the release of involuntary movements in the "on" state and therefore improved motor responses to DA replacement. These results demonstrate the pathophysiological role of upregulated SPN activity and support strategies to reduce striatal glutamate signaling for PD therapy.

## INTRODUCTION

Motor failure in Parkinson's disease (PD) is caused primarily by progressive neurodegeneration of the substantia nigra pars compacta. The loss of nigral dopamine (DA) cells has usually reached a considerable level by the time motor deficits develop (Lang and Lozano, 1998). The central role of DA is also demonstrated by the effectiveness of DA replacement to improve motor symptoms in all stages of the disease. However, our understanding of the pathophysiology of motor control in PD is far from clear, particularly with respect to the response to DA replacement. Adding DA to the system does not restore normal movement but rather induces a partial and short recovery that is further complicated by involuntary movements called dyskinesias (Obeso et al., 2000). Indeed, in experiments that are controlled for pharmacological variables, the effective DA stimulation is not yet followed by the expected restitution of normal function (Bravi et al., 1994; Nutt et al., 2000).

DA modulates the excitability of striatal projection neurons (SPNs), which express DA D<sub>1</sub> receptors (D<sub>1</sub>R) or DA D<sub>2</sub> receptors (D<sub>2</sub>R), forming the direct and indirect striatal output pathways, respectively (Gerfen and Surmeier, 2011). Direct SPNs (dSPNs) and indirect SPNs (iSPNs) undergo multiple functional and morphological changes following nigrostriatal denervation that may be involved in altered responses to dopaminergic stimulation (Surmeier et al., 2014). One of the salient changes is the increased spontaneous SPN activity that has been found across animal models and patients. From activity levels usually below 2 Hz in the normal condition, the average firing frequency increases variably in rodent models to 5–12 Hz under anesthesia (Tseng et al., 2001) and to more than 20 Hz in alert, advanced parkinsonian primates and patients with PD (Liang et al., 2008; Singh et al., 2016). These large SPN activity increases in primates and humans were not yet identified in cells segregated into specific output pathways. In line with classic views of the functional model of PD, the use of optogenetics in transgenic mouse models has suggested that iSPNs are most likely the upregulated units after DA denervation (Kravitz et al., 2010). However, further studies disputed the classic views of the model, demonstrating the cooperative activity of both striatal pathways for basal ganglia outputs and movement initiation (Cui et al., 2013; Freeze et al., 2013). In addition, the primate studies show few low-activity units and opposite responses to DA among the recorded SPNs. These observations are difficult to reconcile with the idea of recordings limited to one SPN subpopulation in the primate and thereby call into question previous assumptions on the distribution of hyperactive SPNs (Beck et al., 2017). Yet crude single-cell recordings in primates and patients critically show that there are large firing increases in the active SPNs in the absence of DA. Such a state of high basal activity likely may interfere with the strength of DA signaling to modulate SPN excitability. Congruent with this premise, dopaminergic stimulation induces unstable changes in SPN firing frequency that are associated with dyskinesias in primates with advanced parkinsonism (Liang

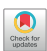

et al., 2008; Singh et al., 2015). Thus, SPN hyperactivity may play a primary role in the altered responses to DA replacement.

Glutamate inputs from cortical and thalamic terminals provide the excitatory drive of the SPN and likely contribute to the hyperactivity developed in PD. The cumulative evidence supports up-regulation of corticostriatal signals (Gubellini et al., 2002; Ingham et al., 1998), but recent data also show changes in the strength of thalamostriatal synapses after DA loss (Parker et al., 2016). Glutamatergic synaptic contacts undergo significant reorganization due to morphological changes of the SPN dendritic arborization (Day et al., 2006; Villalba and Smith, 2017). Notably, spine loss and dendrite changes are differentially developed in dSPNs and iSPNs, indicating that various adaptations may remodel glutamatergic synapses. In the same line, *ex vivo* recordings following DA depletion demonstrate increased excitability and loss of long-term potentiation and depression at corticostriatal synapses (Baggetta et al., 2011; Shen et al., 2008). Although some of these changes can be reversed by DA replacement, corticostriatal synaptic connectivity, strength, and plasticity remain altered (Fieblinger et al., 2014; Picconi et al., 2003). At the level of glutamate receptors, both DA loss and replacement are associated with changes in the expression, subunit composition, and ratio of  $\alpha$ -amino-3-hydroxy-5-methyl-4-isoxazolepropionic acid receptor (AMPA) to N-methyl-D-aspartate receptor (NMDAR) (Baggetta et al., 2012; Mellone et al., 2015). Altogether these data suggest that an intervention to regulate the glutamate signals tuning SPN activity may enable more effective DA modulation.

Here, we used the primate model of advanced PD to study the SPN firing changes related to the motor response induced by dopaminergic stimulation under the control of effective glutamate inputs on the recorded SPN by applying selective NMDAR or AMPAR antagonists. Prior to these tests in the primate, we determined (1) the selectivity of the drug at the concentration applied locally using patch-clamp recordings in cultured cells, (2) the expected concentration of the drug reached *in vivo* using *in silico* prediction of diffusion following intraparenchymal injection, and (3) the corresponding doses of the NMDAR and AMPAR antagonists for an equivalent effect reducing high SPN activity *in vivo*. We also tested the motor effects of glutamate-controlled SPN activity over the primate putamen. Our data show that a decrease of either AMPAR or NMDAR signaling that substantially reduced the basal SPN firing rate results in effective stabilization of the neuronal response to DA during the whole period of reversal of parkinsonian symptoms, referred to as the “on” state. This effect at the single-cell level translated into motor behavioral effects following the NMDAR antagonist infusion over an extended striatal area. The drug-induced reduction of activity across SPNs markedly decreased the dyskinesias caused by L-DOPA. These data support a pivotal role of striatal glutamatergic excitation and SPN hyperactivity in the response to DA replacement in PD.

## RESULTS

### Selectivity of NMDAR and AMPAR Antagonists for *In Vivo* Microinjection Assays

The impact of reduced glutamatergic signaling on the dysregulated SPN activity in parkinsonian monkeys was determined

with single-cell recordings after intrastriatal injection of high concentrations of selective NMDAR and AMPAR antagonists. Because the rapid dilution and diffusion of antagonists *in vivo* can be determined quantitatively, we experimentally confirmed the antagonist selectivity *in vitro* by establishing the concentration-effect relationship for inhibition by each antagonist on currents mediated by recombinant isoforms of NMDAR and AMPAR found in the SPN. We evoked these currents using rapid glutamate applications in order to mimic the time course of the glutamate concentration profile in the synaptic cleft during synaptic transmission (Clements et al., 1992). Pre-application of the NMDAR-selective antagonist LY235959 for 1 s antagonized AMPAR currents only at concentrations much higher than those predicted to be reached with intraparenchymal injection following diffusion and dilution (see below). Specifically, the NMDAR-selective antagonist LY235959 inhibited recombinant AMPAR (GluA1/stargazin) currents by  $80\% \pm 2\%$  at 9 mM and  $50\% \pm 6\%$  at 900  $\mu$ M but only  $13\% \pm 7\%$  at 90  $\mu$ M; the half maximal inhibitory concentration ( $IC_{50}$ ) of LY235959 was 1.1 mM. By contrast, the  $IC_{50}$  of NMDAR antagonist LY235959 at GluN1/GluN2A NMDARs activated by 1 mM glutamate was 12  $\mu$ M (Figure 1A), indicating that LY235959 is at least 100-fold selective for NMDARs over AMPARs activated by concentrations of glutamate reached in the synaptic cleft. We also evaluated the selectivity of the AMPAR competitive antagonist NBQX by determining non-selective inhibition of recombinant GluN1/GluN2A NMDAR currents. NBQX inhibited NMDAR current responses to 1 mM glutamate by  $50\% \pm 0.3\%$  at 1 mM and  $36\% \pm 0.7\%$  at 300  $\mu$ M but only  $14\% \pm 0.6\%$  at 100  $\mu$ M; the fitted  $IC_{50}$  for NBQX non-selective inhibition of GluN1/GluN2A NMDARs was 0.9 mM. By contrast, the  $IC_{50}$  for NBQX inhibition of GluA1/stargazin AMPARs activated by rapid application of 1 mM glutamate was 2.7  $\mu$ M (Figure 1B). Thus, NBQX is 300-fold selective for AMPAR over NMDAR activated by synaptic-like rapid exposure to glutamate. We expect both competitive antagonists to be even more potent at blocking their target receptors when these are activated by brief glutamate pulses in the synaptic cleft, which are less likely to displace any pre-bound antagonist molecules.

The striatum of a rhesus macaque is approximately 1,000 mm<sup>3</sup> (Yin et al., 2009), which is equivalent to 1 mL in volume. Thus, injection of 1  $\mu$ L of antagonist into this brain area, at steady state, would lead to an approximate 1,000-fold dilution. The time dependence of diffusion is governed by Fick's laws and depends on the complex geometry of cell processes forming barriers and hindering diffusion in the brain tissue. We estimated the peak concentration of AMPAR and NMDAR antagonists at different distances and at different time intervals after being injected into brain parenchyma (Figure 1C). Briefly, we described their space-time concentration profile from an instantaneous point source using the classic solution of diffusion from a point source in an isotropic medium, with parameters that describe the diffusion properties of small molecules in the brain neuropil (Savtchenko and Rusakov, 2005; Zheng et al., 2008). The diffusion analysis showed that a more than 1,000-fold dilution of LY235959 or NBQX occurs within less than 1 min from the injection (Figures 1D and 1E). These data suggest that injection of millimolar concentrations of antagonists will rapidly produce sub-micromolar

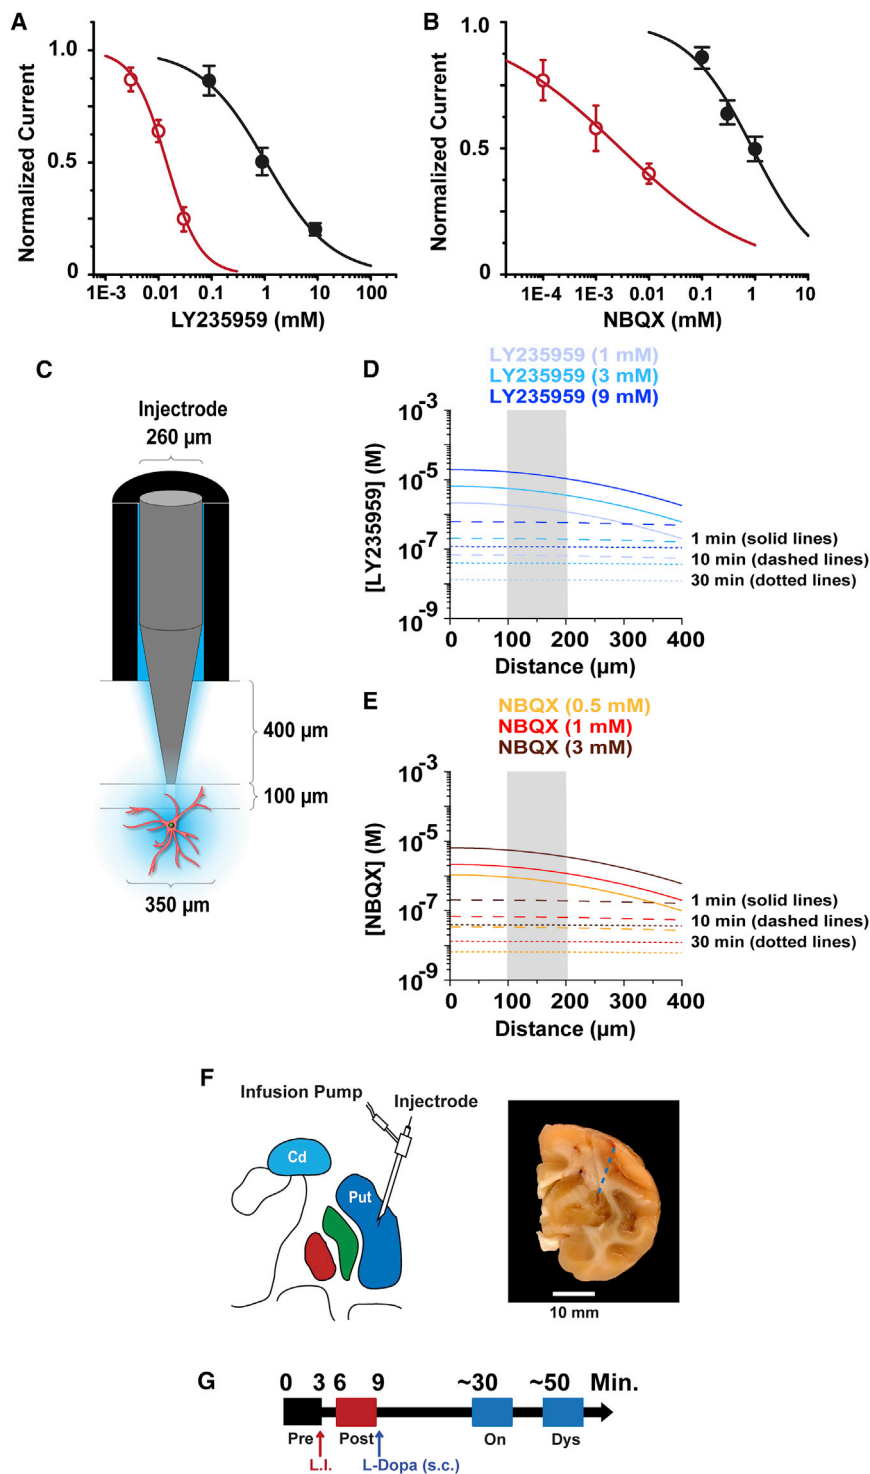

**Figure 1. In Vitro Assessment of Drug Concentration-Effect Relationship, Prediction of Brain Dilution, and Recording Timeline**

(A) The effects of increasing concentrations of LY235959 on responses to rapid application of 1 mM glutamate from GluA1/stargazin receptors expressed in HEK cells measured using patch-clamp recordings (black symbols; five HEK cells per concentration). The effects of LY235959 on GluN1/GluN2A receptor responses activated by 1 mM glutamate and 10  $\mu\text{M}$  glycine expressed in oocytes held under two-electrode voltage clamp (red symbols; five oocytes). Error bars indicate SEM.

(B) Concentration-response data for NBQX inhibition of GluN1/GluN2A responses to 1 mM glutamate and 10  $\mu\text{M}$  glycine for receptors expressed in *Xenopus* oocytes measured using two-electrode voltage clamp (black symbols; four oocytes). NBQX concentration response data for GluA1/stargazin receptors activated by 1 mM glutamate obtained using patch-clamp recordings (red symbols; four HEK cells). Error bars indicate SEM.

(C) Schematic representation of the injectrode used to apply aSCF, LY235959, or NBQX to the putamen of primates.

(D) Peak LY235959 concentration (y axis) reached at various distances from the injection site (x axis) 1, 10, and 30 min following injections. The color-coded traces refer to data obtained when injecting 1, 3, or 9 mM LY235959. The gray shaded area between 100 and 200  $\mu\text{m}$  represents the location from which the SPN activity was recorded.

(E) As in (D) for 0.5, 1, or 3 mM NBQX.

(F) Schematic drawing of the injection site depicting the injectrode with recording electrode in the putamen (left) and a coronal brain section with a small scar at the site of guide cannula penetration. The dashed blue line represents the injectrode trajectory (right).

(G) Timeline of the continuous single-cell recording showing data storage before (“pre,” black box) and after the local injection (L.I.) of antagonist or vehicle (“post,” red box), and again after transitioning to the “on” state and the dyskinesia state (blue boxes) following the s.c. L-DOPA injection.

antagonists reached concentrations in brain parenchyma that were selective following microinjection.

### Dose Selection of NMDAR and AMPAR Antagonists

On the basis of the results of antagonists’ specificity *in vitro* and on available estimates of drug dilution in brain tissue,

concentrations in the brain tissue surrounding the injection site. These simulations, together with voltage-clamp recordings of the non-equilibrium receptor response to the rapid application of glutamate at concentrations that approach those in the synapse, suggest that our *in vitro* estimation of diffusion and potency can be used to predict *in vivo* properties and that the

we performed repeated striatal microinjections of 1–9 mM LY235959 and 0.5–3 mM NBQX in the parkinsonian primate to select doses that are equally effective in reducing cell activity for application in subsequent experiments of L-DOPA administration. A dose-dependent decrease in spontaneous SPN firing frequency was observed with each antagonist

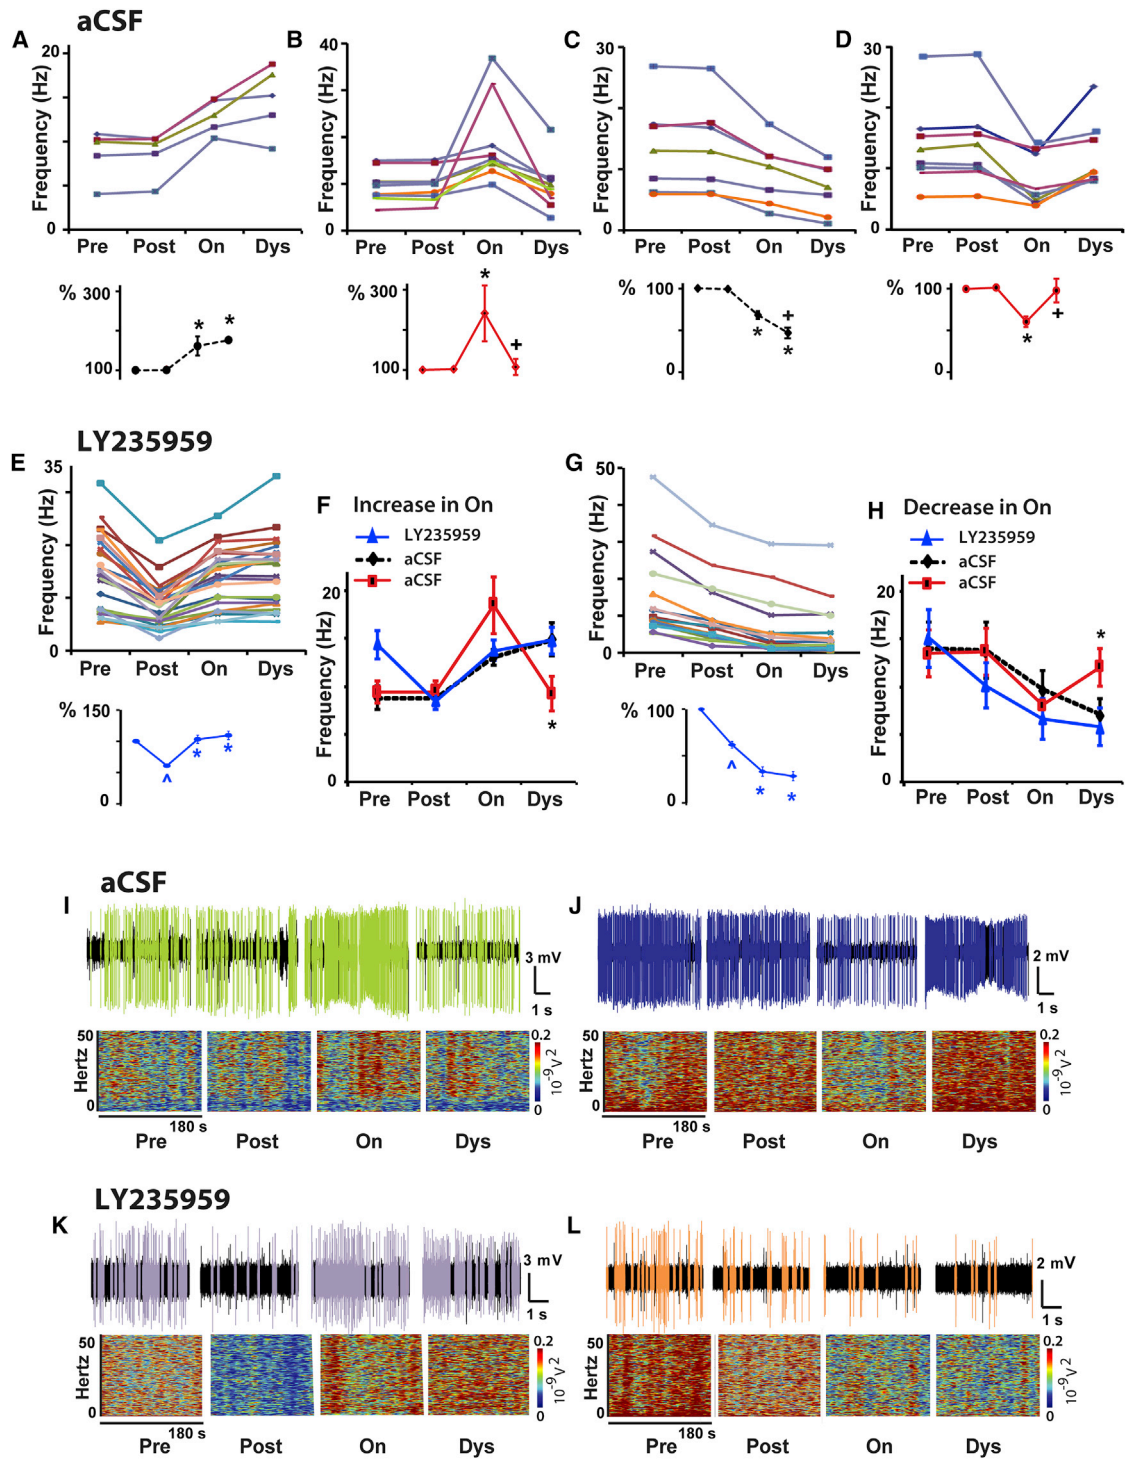

**Figure 2. NMDAR Antagonist Injection at the Site of SPN Recording Reduced the Basal Activity and Stabilized DA Responses in the Parkinsonian Primate**

(A–D) Control tests. Firing frequency changes of each SPN at baseline (pre), after local injection of aCSF (post), and after transitioning to “on” (on) and dyskinesia states (dys) following s.c. injection of L-DOPA. In each panel, each colored curve (top graph) represents an individual SPN grouped according to the type of DA response (increase, A and B, or decrease, C and D, in the “on” state followed by stable, A and C, or unstable, B and D, response in the dyskinesia state), and the averaged firing frequency change for the group is shown as percentage (bottom graph). In each SPN, differences between post and on are significant at  $p < 0.01$  (A–D). Responses were classified as unstable by significant changes in the dyskinesia state ( $p < 0.01$ ). Total SPNs, 29; units with activity increase, 14; units with activity decrease, 15.

(legend continued on next page)

(Figures S1 and S2; a total of 69 SPNs, 8–10 SPNs per antagonist dose). In order to avoid reaching the extremes of the concentration-response relationship (variable subtle effects and firing silence), the antagonist dose that reduced activity by approximately 50% (45%–55% of the baseline firing rate) was the selected dose. On average, microinjection of 9 mM LY235959 and 1 mM NBQX produced 44% (10 SPNs;  $p < 0.001$ ) and 47% (10 SPNs;  $p < 0.01$ ) reductions in firing frequency, respectively. Therefore, these doses had equivalent inhibitory actions on SPN activity and were injected at the site of recording in all subsequent single-cell recording experiments to analyze changes in the SPN response to DA input.

### Effect of Reduced NMDAR and AMPAR Signaling on the SPN Response to DA in Parkinsonian Primates

The SPN activity in parkinsonian primates ( $n = 5$ ; Table S1) was recorded continuously throughout the local application of artificial cerebrospinal fluid (aCSF) (control tests), LY235959, or NBQX, and s.c. L-DOPA injection that induced motor changes (Figures 1F and 1G). Recordings started in the “off” state from before to after local injection and continued through the L-DOPA-induced “on” and dyskinesia states. Thus, neuronal activity data were stored for offline analysis at the following time points: (1) before local injection (“pre”), (2) after local injection (“post”), (3) “on” state (onset of reversal of parkinsonism induced by L-DOPA; “on”), and (4) dyskinesias (L-DOPA-induced dyskinesias at the peak-dose effect; “dys”). Following local aCSF application (control test) that had no effect or produced very brief changes of SPN activity (pre to post), L-DOPA induced the typical responses of increased or decreased firing frequency (post to on; Figures 2A–2D) (Singh et al., 2015). In these control tests, SPN activity increased in 14 units and decreased in the other 15 units, and these firing changes correlated with the behavioral changes indicating that the animal had transitioned to the “on” state. Also, aCSF application had no effect on the magnitude of responses. The firing frequency in the “on” state increased by 106% and decreased by 36% (average changes in SPNs grouped by their response to DA), comparable with previously reported data. At the peak of L-DOPA effect, the firing rate changes were maintained or continued to develop (stable responses) in 41% of SPNs (on to dys; Figures 2A and 2C). In contrast, at the peak effect responses reversed in 59% of SPNs producing the inverted firing rate changes during the “on” state that correlate with the appearance of peak-dose dyskinesias in advanced parkinsonian primates (Figures 2B, 2D, 2I, and 2J) (Liang et al., 2008).

Following reduction of the baseline (“off” state) SPN activity by LY235959 application, L-DOPA administration produced changes in SPN firing associated with the “on” state that were

similar to those found in control experiments (i.e., activity increase or decrease from post to on). However, the firing frequency changes during the “on” state were stable in the large majority of SPNs (Figures 2E–2H, 2K, and 2L). As dyskinesias remain the same with the limited effect of local microinjection of LY235959, the stabilized SPN activity in response to DA was caused by the NMDAR antagonist. Similar effects were obtained with NBQX application (Figure 3). Thus, both NMDAR and AMPAR antagonists at selective doses that induced nearly 50% reduction of SPN activity equally prevented the inversion of frequency changes at the peak of the L-DOPA response (concomitant with dyskinesias), contrasting with the control experiments with application of aCSF alone that resulted in a large number of inverted (unstable) responses. The stability of changes during the “on” state in experiments of local application of NMDAR or AMPAR antagonist was found regardless of the type of response to L-DOPA (i.e., increase or decrease of the firing rate during the “on” state). Following LY235959 application, 39 of 43 SPNs had stable responses to L-DOPA, and following NBQX application, 43 of 45 SPNs also had stable responses, reaching a total of 93% of the recorded SPNs with stable responses (Figures 4 and S3). Therefore, the blockade of NMDAR or AMPAR transmission that effectively reduced the SPN hyperactivity of the parkinsonian state restored full, stable responsiveness to DA signaling.

To further determine the relationship between the DA response and the activity reduction induced by the NMDAR or AMPAR antagonist, we analyzed the correlation of firing changes in each SPN. The lowered firing frequency after LY235959 or NBQX application at the recording site (post/pre) was a predictor of the amount of increased activity in response to L-DOPA at the initial behavioral change (on/post), or at the peak-dose effect (dys/post), accounting for 35%–50% of the change (see  $R^2$  values in Figures 5A and 5B;  $p < 0.01$ ). In this subset of SPNs (units with DA-induced activity increase), the response to DA was thus highly dependent on the level of reduced basal activity. In contrast, in the SPN subset with DA-induced activity decrease, the amount of activity reduction in the “on” or dyskinesia state was not predicted by the level of reduced basal activity (Figures 5C and 5D;  $p > 0.05$ ). In this subset of SPNs, DA-induced changes stabilized, but the strength of the response was independent of the reduced baseline activity. Therefore, data indicate different DA regulation across the distinguished SPN subsets.

### Effect of Reduced Striatal NMDAR Signaling on Motor Responses to L-DOPA in Parkinsonian Primates

Motor responses to L-DOPA in primates with advanced parkinsonism are consistently complicated by dyskinesias that are

(E–H) NMDAR antagonist tests. The firing frequency changes of each SPN as described above for control tests are shown in (E) and (G) after local injection of LY235959. In each SPN, differences between pre and post and between post and on are significant at  $p < 0.01$ . Differences between on and dys were non-significant (see also Figure S3). SPN stable responses after LY235959 are compared with control tests in (F) and (H). Total SPNs, 39; units with activity increase in the “on” state, 24; units with activity decrease, 15. In each group analysis,  $^{\wedge}p < 0.01$  versus baseline,  $^*p < 0.01$  versus post aCSF or LY235959 injection, and  $^{\wedge}p < 0.01$  versus the “on” state (ANOVAs for repeated-measure followed by Bonferroni correction). In (F) and (H),  $^*p < 0.05$  between LY235959 and aCSF unstable response (one way ANOVAs). Error bars indicate SEM ( $n = 5$  primates; see Table S1).

(I–L) Examples of SPN unstable responses in aCSF tests (I and J) or stable responses in LY235959 tests (K and L). Short (5 s) spike trains and spectrograms for the segment duration (180 s) are shown for each segment (pre, post, on, and dys). The unit activity is colored after spike sorting as the corresponding curve in the frequency graphs (B), (D), (E), and (G).

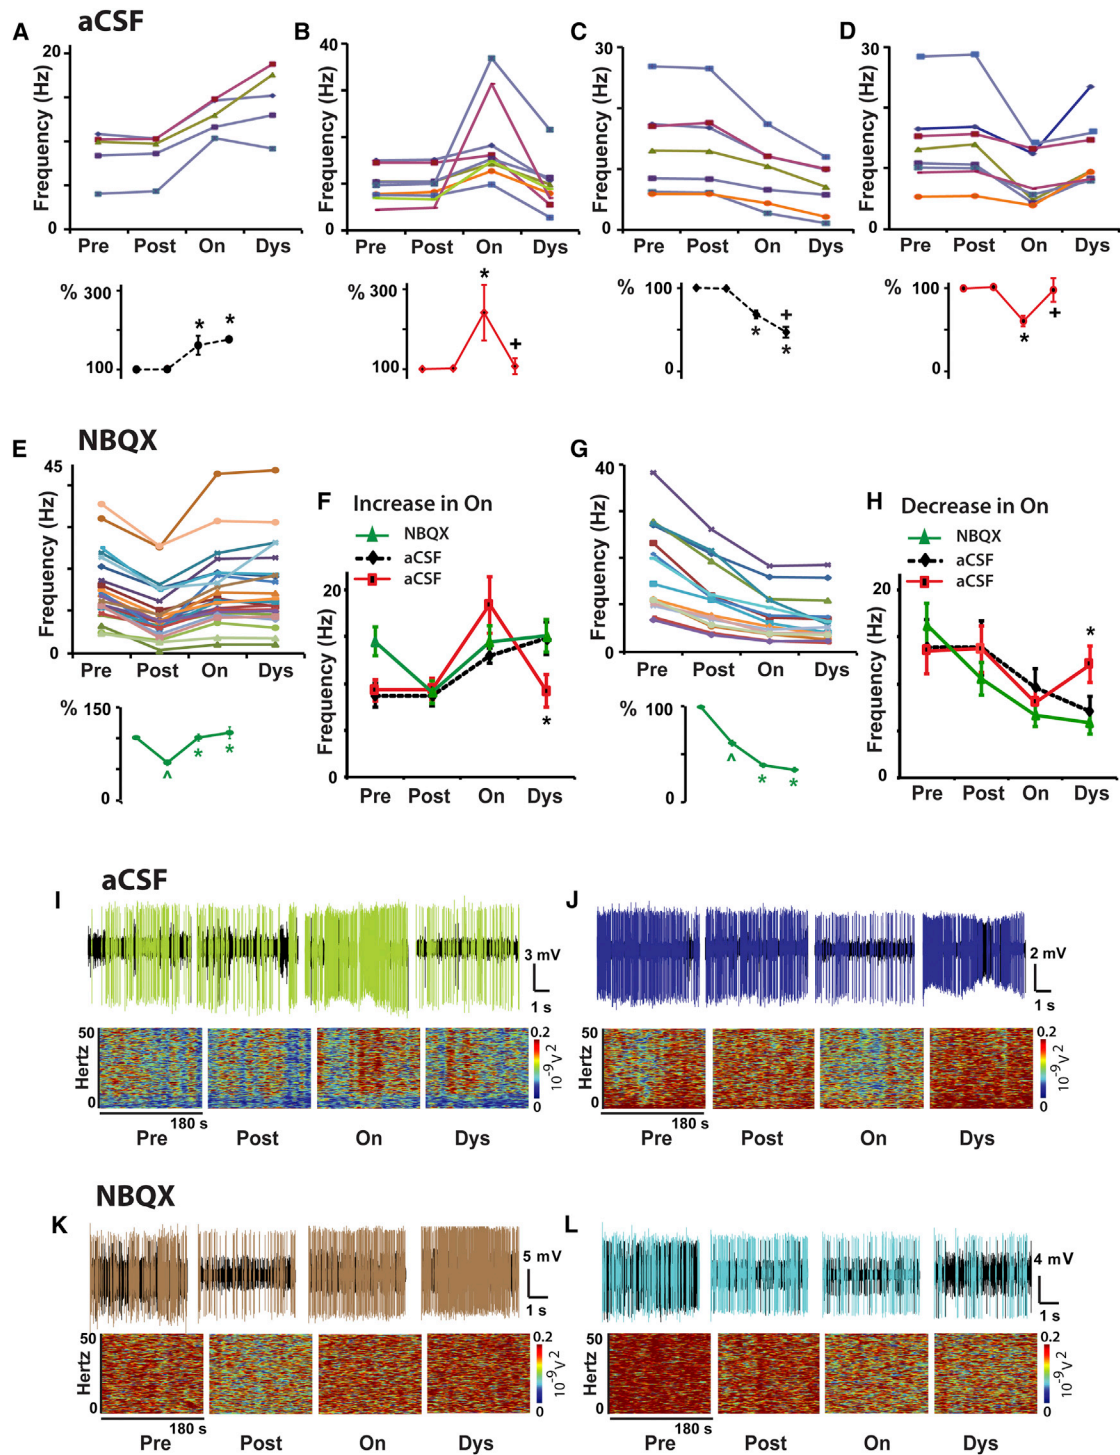

**Figure 3. AMPAR Antagonist Injection at the Site of SPN Recording Reduced the Basal Activity and Stabilized DA Responses in the Parkinsonian Primate**

(A–D) The same control data as presented in Figures 2A–2D, respectively, for comparison with results obtained with the AMPAR antagonist. See Figure 2 for details.

(E–H) AMPAR antagonist tests. Firing frequency changes of each SPN as described for control tests are shown in (E) and (G) after local injection of NBQX. In each SPN, differences between Pre and Post, and between Post and On are significant at  $p < 0.01$ . Differences between On and Dys were non-significant (see also Figure S3). SPN stable responses after NBQX are compared to control tests in (F) and (H). Total SPNs, 43; units with activity increase in the “on” state, 26; units with activity decrease, 17.

(legend continued on next page)

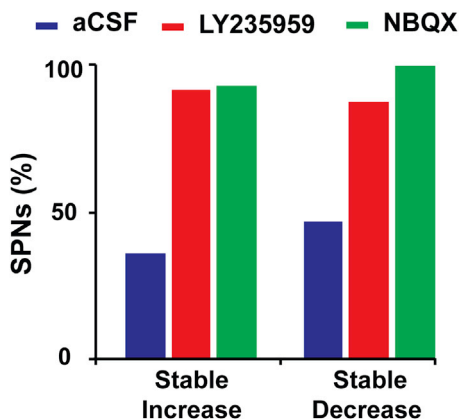

**Figure 4. DA Responses after Local NMDAR or AMPAR Blockade Are Stable across SPNs**

The proportion of SPNs with stable DA responses is compared after local injection of aCSF, LY235959, or NBQX. More than 90% of SPNs with LY235959 or NBQX injection exhibited stable DA responses (activity increase or decrease), but fewer than 50% of SPNs with aCSF injection. Total SPNs, 117; stable responses, 39 of 43 in LY235959 tests, 43 of 45 in NBQX tests, and 12 of 29 in aCSF tests (see complementary data on unstable DA responses in Figure S3).

associated with inversion of the SPN firing rate changes during the “on” state. To test whether the reduced glutamatergic transmission that stabilized the SPN response to L-DOPA had the expected behavioral correlate, LY235959 (9 mM) or aCSF was infused unilaterally into the putamen of primates ( $n = 3$ ; Table S1) before the s.c. injection of L-DOPA. The infusion volume (10  $\mu$ L) was intended to cover only the most posterolateral region corresponding to the sensorimotor territory (Sanftner et al., 2005). The preselected individual dose of L-DOPA induced reproducible monophasic peak-dose dyskinesias in the tested animals. Striatal infusion of the NMDAR antagonist reduced the global dyskinesia scores (Figures 6A and 6C) because of 71% lower scores in the hemibody contralateral to the infusion side after L-DOPA injection ( $p < 0.05$ ; Figures 6B and 6D; Movies S1 and S2). LY235959 infusion did not affect the antiparkinsonian action of L-DOPA (unchanged motor disability scores [MDS],  $p > 0.05$ ; Figure 6E). Therefore, LY235959 infusion into the putamen showed that the extended stabilization of DA responses across SPNs translates into motor changes with significantly reduced dyskinesias. This demonstrates that decreasing glutamatergic excitation in the striatum induces beneficial motor effects in the parkinsonian primate.

The motor effects of systemic administration of LY235959 and NBQX were also tested in a group of parkinsonian primates ( $n = 5$ ; Table S1) that included three of the animals used in striatal application of the antagonists. Both LY235959 (3 mg/kg s.c.)

and NBQX (2 mg/kg s.c.) significantly reduced dyskinesias ( $p < 0.05$ ; Figures S4 and S5) without compromising the antiparkinsonian action of L-DOPA (Löschmann et al., 1991; Papa and Chase, 1996). The similarity of these effects (including animals used for SPN recordings) to those obtained with striatal infusion suggests that the reduction of glutamate signals on SPNs may be responsible for the effects induced by systemic administration.

## DISCUSSION

The selective reduction of either NMDAR or AMPAR signals in SPNs tested here in parkinsonian primates supports our hypothesis that altered SPN responses to DA and their associated abnormal movements can be reversed by controlling the dysregulated glutamatergic drive. Because the animals used in these single-cell recordings had developed significant SPN hyperactivity, the impact of antagonist application on the spontaneous firing of these neurons was fully assessed. The most important finding from this study was that the reduced excitatory glutamate signals resulted in stable responses to DA in 93% of the recorded SPNs, and these effects were found across single recordings of SPNs regardless of their response to DA (i.e., units with activity increase or decrease). In addition, both the NMDAR and AMPAR antagonists equally stabilized DA responses in the large majority of neurons, and effects of the NMDAR antagonist on an extended putamenal area reduced dyskinesias improving the L-DOPA response.

The interpretation of the recorded SPN activity is limited by lack of specific cell-type identification with optogenetics, because transgenic modeling could not be applied to these primate studies. More important to this end, DA stimulation evokes pathological “unstable” responses that are widely distributed across neurons, with an increase or decrease of activity in the “on” state. Indeed, as L-DOPA reaches its peak effect, a high proportion of units do not maintain the DA-induced firing increase or decrease, which contrasts markedly with stable changes in other units and thereby creates a large imbalance of discharges. On the basis of evidence that the cooperative activity of both striatal pathways mediates normal movement execution (Cui et al., 2013), imbalance of discharges between and within the output pathways may lead to abnormal motor responses, releasing involuntary movements or causing motor fluctuations (Singh et al., 2015; Tecuapetla et al., 2014). In support of this view, the instability of DA-induced firing changes that causes discharge imbalance is associated with dyskinesias in the primate. Here, DA-induced responses were consistently stabilized across SPNs after glutamate inputs were blocked and the high baseline firing frequency was decreased, indicating that hyperactivity across SPNs is a key mechanism in the pathophysiology of PD “off” and “on” states. These data are

In each group analysis,  $\hat{p} < 0.01$  versus baseline,  $*p < 0.01$  versus Post aCSF or NBQX injection, and  $+p < 0.01$  versus the “on” state (ANOVAs for repeated measure followed by Bonferroni’s correction). In (F) and (H),  $*p < 0.05$  between NBQX and aCSF unstable response (one way ANOVAs). Error bars indicate SEM ( $n = 5$  primates; see Table S1).

(I–L) Examples of SPN unstable responses in aCSF tests (I and J), same examples as in Figures 2I and 2J for comparison) or stable responses in NBQX tests (K and L). Short (5 s) spike trains and spectrograms for the segment duration (180 s) are shown for each segment, Pre, Post, On, and Dys. The unit activity is colored after spike sorting as the corresponding curve in the frequency graphs B, D, E and G.



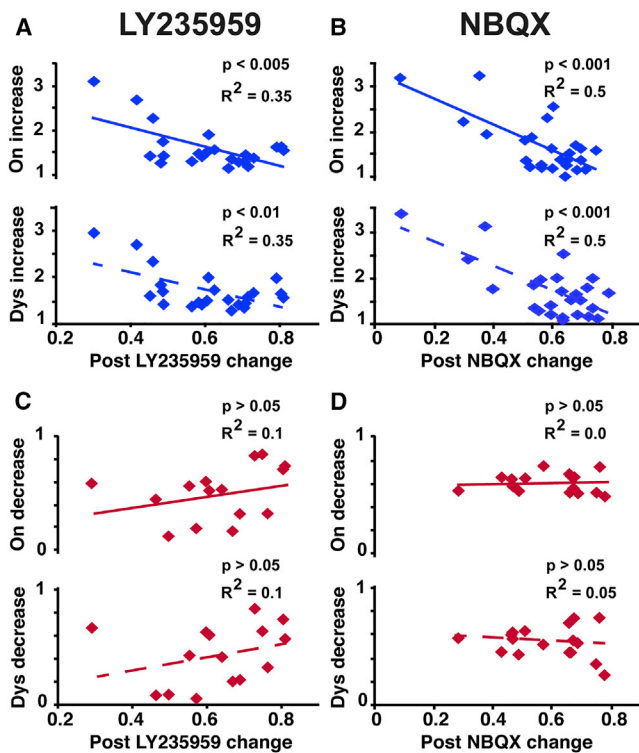

**Figure 5. Relationship between the Effect of NMDAR or AMPAR Antagonist and the Magnitude of the SPN Response to DA**

(A–D) Significant (blue) and non-significant (red) correlations between the activity reduction induced by LY235959 (A and C) or NBQX (B and D) and the DA response analyzed in the “on” state or dyskinesia state (top and bottom graphs, respectively in each panel).

Firing frequency reduction post LY235959 or NBQX: ratio of post-antagonist injection to baseline frequencies. Firing frequency increase or decrease in “on” or dyskinesia state: ratio of motor state to post-antagonist injection frequencies. SPNs included in all regression analyses had stable responses to DA (total SPNs, 82; in LY235959 tests, 24 SPNs with activity increase in response to DA and 15 with activity decrease; in NBQX tests, 26 SPNs with activity increase in response to DA and 17 with activity decrease).

consistent with findings in patch recordings of iSPNs (Fieblinger et al., 2014) showing that DA denervation induces marked homeostatic plasticity (reduced excitability and spine loss and pruning of corticostriatal synapses), but the corticostriatal synaptic strength increased as opposed to the expected scaling (Turrigiano, 2008). However, these patch recording data are not aligned with hyperactivity also present in dSPNs, should that be the case. Some distinctions when comparing data from largely different models may be relevant, even in the same species (Beck et al., 2017; Deffains et al., 2016). Among the most important are the lesion type and its time course, which may influence the development of adaptive and aberrant changes, such as spine remodeling (Villalba and Smith, 2017). Unlike unilateral and acute lesions, the primates used here had a bilateral and “slowly” induced parkinsonism that was classified as advanced with long-standing chronicity (Potts et al., 2014). Thus, it is plausible that extensive SPN hyperactivity does not fully develop in commonly used rodent and primate models. Of note, gene regulation after DA loss leads to changes in

voltage-gated potassium and calcium (VDCC) channels in dSPNs that can increase excitability (Borgkvist et al., 2015; Calabresi et al., 2014; Meurers et al., 2009). Whether present in SPNs expressing D<sub>2</sub>R or D<sub>1</sub>R, our results indicate that exaggerated upregulation of firing plays a primary role in the activity changes of the “on” state, likely interfering with DA-modulated excitability, which then can only result in transient (short) firing changes. The application of glutamate antagonists that reduced SPN activity by half restored sustained (stable) firing increases or decreases in response to DA. Interestingly, the strength of the DA response correlated with the level of basal activity reduction by the antagonist only in SPNs with DA-induced firing increase. These data support differential DA modulation across SPNs after denervation that is congruent with the imbalance of responses to L-DOPA and the associated abnormal motor effects.

Reducing neurotransmission at NMDAR or AMPAR had the same effect on the firing frequency of SPNs and similarly stabilized their DA responses. It is important to note that the present data do not exclude the potential effects of manipulating other signals, such as gamma-aminobutyric acid (GABA). However, the activity of fast spiking interneurons, which provide most GABA inhibition of SPNs, is not affected by DA loss (Mallet et al., 2006). Instead, the reported changes in cortical and thalamic inputs after DA loss indicate a key role of glutamate signaling in SPN hyperactivity. Our findings indicate that both NMDAR and AMPAR signaling can contribute to SPN dysfunction and that controlling glutamate signaling has a significant effect. Perhaps the most parsimonious explanation of these results is that the SPN AMPARs and NMDARs are co-localized on the same postsynaptic site and act as canonical coincidence detectors. Robust NMDAR-mediated depolarization requires the prior release of a voltage-dependent block via the activation of AMPARs (Huganir and Nicoll, 2013). Therefore, in the presence of NBQX, block is not released, and the excitatory synapse is silenced. Conversely, in the presence of LY235959, AMPARs are fully activated, but too briefly to mediate a robust and prolonged depolarization. Therefore, block of either AMPARs or NMDARs is sufficient to attenuate activity at excitatory synapses and reduce firing rate. In addition, the impact may be more significant on receptors with slow deactivation kinetics, such as the SPN NMDARs (Logan et al., 2007), particularly after DA loss. Differences in glutamatergic signaling after DA lesion have been linked to changes in the expression, composition, trafficking, and localization of ionotropic receptors. Furthermore, some receptor changes are related to lesion extent, such as increased NMDAR/AMPA ratio (Paillé et al., 2010), and some to chronic DA replacement and dyskinesia development, such as increased GluN2A/GluN2B ratio (Hallett et al., 2005; Mellone et al., 2015). Reorganization of NMDAR subunits following DA denervation leads not only to reduction of GluN2B but also to a newly developed contribution of GluN2D in functional receptors of SPNs (Zhang and Chergui, 2015). Changes in NMDAR distribution between synaptic and extrasynaptic location can also result in increased gain of transmission (Fieblinger et al., 2014). In addition, the AMPAR subunit composition plays a key role in synaptic strength. Notable changes in models of DA loss are the hyperphosphorylation of GluR1 and the expression of Ca<sup>2+</sup>-permeable GluR2-lacking AMPAR (Bagetta et al., 2012).

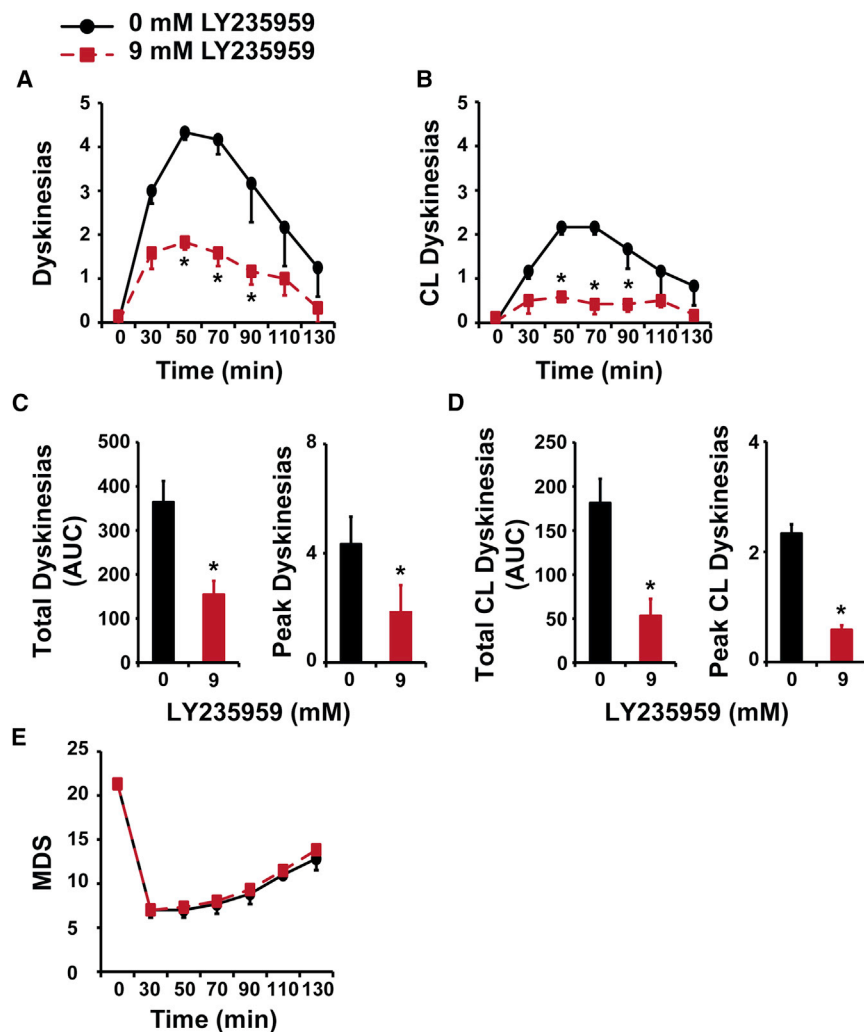

**Figure 6. Infusion of NMDAR Antagonist over the Putamen Reduced Contralateral Dyskinesias Induced by L-DOPA in Parkinsonian Primates**

(A and B) Time course of global (A) and contralateral (CL) (B) dyskinesias induced by s.c. injection of a suboptimal dose of L-DOPA after unilateral infusion of LY235959 into the posterolateral putamen. Reduced global scores by LY235959 infusion (red) (9 mM) compared with the control vehicle infusion (black) reflect differences in scores on the contralateral side of the body (see also [Movies S1](#) and [S2](#)). Time 0, before L-DOPA injection (“off” state before infusion). Scores after L-DOPA injection: 30 min post-injection and thereafter every 20 min interval until dyskinesias disappear and the mobility was returning to the “off” state. \* $p < 0.01$ , two-way ANOVAs for repeated-measures followed by Fisher’s PLSD test.

(C and D) Total and peak scores of global (C) and contralateral (D) L-DOPA-induced dyskinesias after infusion of LY235959 (red) and aCSF (black). Scales are adjusted for the contralateral side (D). AUC, area under the curve. Peak values, 50 min interval scores. \* $p < 0.01$ , paired  $t$  tests.

(E) Motor disability scores (MDS) showing no changes in the antiparkinsonian effects of L-DOPA after LY235959 infusion in comparison with aCSF infusion.

Each animal ( $n = 3$ ; see details in [Table S1](#)) received one infusion of each dose (LY235959 0 and 9 mM). Error bars indicate SEM.

Changes in  $Ca^{2+}$  kinetics are consistent with the pathological basal activity of SPNs and potentially their “unstable” response to DA. The NMDAR- and AMPAR-selective competitive antagonists (LY235959 and NBQX) used here were not subunit selective, and thus each effectively blocked most receptor subtypes within the targeted families, reducing the “off”-state hyperactivity to a similar extent as intended for comparison. Therefore, the ability of both NMDAR and AMPAR blocks to induce the same stabilization of DA responses supports the contribution of pre-synaptic (increased input) and postsynaptic (hyperexcitability) mechanisms in the SPN dysfunction.

The consistent glutamate antagonist effect on single neurons suggested that extended effects across SPNs would prevent the imbalance of discharges, and possibly improve the behavioral response to DA. Our tests support this idea. The infusion of the same concentration of the NMDAR antagonist over an extended area of the putamen reduced dyskinesias in the parkinsonian primate. Because the infusion into the putamen was unilateral and centered on the posterolateral motor territory using a discrete volume to avoid overflow to surround-

ing extrastriatal areas, most likely the covered area did not extend to the whole target region, but nevertheless, dyskinesias were reduced by 71%. In line with our results, the only drug in clinical use to treat dyskinesias is amantadine, an agent with actions at multiple sites, including the NMDAR ([Oertel et al., 2017](#)). On the basis of the effects of selective agents, the antidyskinetic effect of amantadine is likely mediated by NMDAR block. Regarding further effects of NMDAR antagonists on L-DOPA responses, it is possible that chronically reduced SPN activity also results in reduction of motor fluctuations and improved “on” state. In addition to chronic block, the antagonist intrinsic effect on parkinsonism remains to be tested, because in the present tests the infusion timeline was designed to assess L-DOPA-induced dyskinesias. Importantly, the present results provide proof of concept for the significance of reduced glutamatergic tone and stabilization of DA-induced firing changes in SPNs.

Because the current therapy for patients with PD remains symptomatic and based on dopaminergic stimulation for relief of motor disability, the present results have significant clinical implications. Treatment efficacy depends on consistently recovering mobility with responses free of dyskinesias, but most patients between mid- and late-stage disease suffer from disabling motor complications. Critically, the primates used in these experiments reproduced the phenotype of patients in

that category, and SPN recordings in these patients have shown the same level of SPN hyperactivity as in the parkinsonian primate. Likewise, glutamate-driven SPN hyperactivity plays a central role in the abnormal DA responses developed in patients with PD. Strategies targeting specifically the striatal glutamate overactivity may thus help improve the efficacy of DA replacement. Of particular interest are the mechanisms regulating protein composition and posttranslational changes in AMPARs/NMDARs, including molecular changes that increase AMPAR activity or channel conductance (Hosokawa et al., 2015; Jenkins et al., 2014; Kristensen et al., 2011) and thereby upregulate SPN activity.

## EXPERIMENTAL PROCEDURES

### *In Vitro* NMDAR and AMPAR Blockade and Simulated Antagonist Diffusion

The experiments *in vitro* and simulations of drug diffusion in brain tissue were designed to determine whether LY235959 and NBQX would yield concentrations that selectively blocked NMDAR or AMPAR, respectively, using the specific space and time parameters of the microinjection used for recording experiments. Details are provided in [Supplemental Experimental Procedures](#).

### Non-human Primate Model of PD

Nine adult male and female macaques (*Macaca mulatta* and *Macaca fascicularis*; 5–11 kg body weight) were used in the studies (see [Table S1](#)). All procedures followed guidelines of the NIH Guide for the Care and Use of Laboratory Animals and were approved by the Institutional Animal Care and Use Committee of Emory University. A model of “chronic and advanced” parkinsonism was produced in all animals by systemic administration of 1-methyl-4-phenyl-1,2,3,6-tetrahydropyridine (MPTP), and behavioral assessment using a standardized motor disability scale for primates. In these parkinsonian primates, the daily maintenance L-DOPA treatment led to the development of L-DOPA-induced dyskinesias. In each animal, the effective subcutaneous (s.c.) dose of L-DOPA methyl ester plus benserazide (Sigma-Aldrich) for use in recording experiments was determined as the dose eliciting a clear “on” state with peak-dose dyskinesias. A complete description is provided in the [Supplemental Information](#).

### Continuous Single-Cell Recording with Striatal NMDAR or AMPAR Blockade and L-DOPA-Induced Motor States

Five animals were surgically implanted with recording chambers and head-restraining devices, and striatal regions were identified with electrophysiological mapping of basal ganglia. Standard techniques were used for single-cell recordings with withdrawal of the oral maintenance L-DOPA treatment the day of recording. NMDAR or AMPAR antagonist was delivered at the site of recording, using “injectrodes” connected to a microinjection pump. The antagonist solution (or the same volume of aCSF alone as control test) was injected in a volume of 200 nL at a rate of 1  $\mu$ L/min. LY235959 was dissolved in aCSF and NBQX in aCSF/water. The tip of the electrode was placed at a fixed distance from the tip of the cannula (400  $\mu$ m; [Figure 1C](#)). The antagonist concentration (within the limits set from *in vitro* tests and simulations to maintain selective doses at the synapses) that effectively reduced activity of the recorded cell by ~50% was assessed using different drug concentrations and analyzing a total of 69 SPNs. After dose selection, complete experiments started by local application of antagonist followed by s.c. L-DOPA injection at the predetermined dose with data storage ( $\geq 3$  min) according to the timeline ([Figure 1G](#)). If the baseline activity was held throughout the total duration of the experiment, the offline analysis yielded one or occasionally two units per experiment. A total of 117 SPNs were analyzed in complete experiments of DA responses, 88 SPNs for antagonists, and 29 SPNs for vehicle control tests. The animal’s behavior was monitored using a video camera. Details of experiments, including online unit isolation, behavioral changes during recordings indicative of motor states and histological verification of recording sites are included in the [Supplemental Information](#).

### Electrophysiology Data Analysis and Statistics

All data were analyzed offline using spike sorting and standard methods for differentiation and classification of SPNs ([Figure S6](#)). Significant activity changes in the “on” state ( $p < 0.05$ , ANOVAs for repeated-measures followed by post hoc Bonferroni test) separated units with increase or decrease response. Also, significant frequency changes in dyskinesia state determined whether the increased or decreased firing rate in the “on” state was stable or not. Activity changes in the “on” and dyskinesia states were analyzed for their relationship to the reduced firing frequency after the local application of LY235959 or NBQX using the regression equation

$$\frac{F_{Dopamine}}{F_{Antagonist}} = \beta \frac{F_{Antagonist}}{F_{Baseline}} + \alpha,$$

where  $F_{Dopamine}$  is frequency after L-DOPA injection in either “on” or dyskinesia state,  $F_{Antagonist}$  is frequency after the local antagonist injection, and  $F_{Baseline}$  is frequency before antagonist injection. All analyses are described in details in the [Supplemental Information](#).

### Striatal Infusion of Antagonist

LY235959 (9 mM) was dissolved in aCSF, and 10  $\mu$ L of the solution distributed among five sites (2  $\mu$ L/site) was infused unilaterally into the posterolateral putamen in three animals (see the criteria for selection of infusion parameters in the [Supplemental Information](#)). Ten minutes following the completion of infusion, the animal received s.c. injection of L-DOPA at the selected suboptimal dose. Because of the invasiveness of the procedure, each animal could receive only two infusions, one infusion of LY235959 and another infusion of vehicle alone (aCSF10  $\mu$ L) as control. [Movies S1](#) and [S2](#) are accompanied by movie legends provided in the [Supplemental Information](#). All details of the procedure and the behavioral assessment after brain infusion or systemic administration of antagonist are provided in the [Supplemental Information](#).

### Statistical Analysis of Behavioral Data

Behavioral responses were graded within wide ranges, and values included no integers, so data formed quantitative variables, which were analyzed using ANOVAs for repeated-measures ( $p < 0.05$ ) followed by post hoc Fisher’s protected least significant difference (PLSD) tests. In all analyses, data distribution and variance homogeneity were examined, and appropriate corrections applied. Further details are provided in the [Supplemental Information](#).

## SUPPLEMENTAL INFORMATION

Supplemental Information includes Supplemental Experimental Procedures, six figures, one table, and two movies and can be found with this article online at <https://doi.org/10.1016/j.celrep.2017.12.095>.

## ACKNOWLEDGMENTS

This work was supported by NIH grants NS045962 and NS073994 (S.M.P.) and NS036654 and NS065371 (S.F.T.); SUNY Albany Research Foundation, and National Science Foundation (NSF) grant IOS1655365 (A.S.); and National Center for Research Resources (NCR) grant RR000165 and Office of Research Infrastructure Programs (ORIP)/OD grant OD011132 (Yerkes National Primate Research Center). We thank Dr. Yoland Smith for advice on histological parameters and Bhagya Dyavar Shetty for technical assistance in the production and care of the primate model with advanced PD.

## AUTHOR CONTRIBUTIONS

Design and Conceptualization, S.F.T. and S.M.P.; Investigation, A.S., M.A.J., K.J.B., and G.B.; Analysis, A.S., M.A.J., A.J., A.S., S.F.T., and S.M.P.; Writing, A.S., M.A.J., A.J., A.S., S.F.T., and S.M.P.; Review and Editing, A.S., M.A.J., K.J.B., G.B., A.J., A.S., S.F.T., and S.M.P.

## DECLARATION OF INTERESTS

The authors declare no competing interests.

Received: June 23, 2017

Revised: September 9, 2017

Accepted: December 26, 2017

Published: January 23, 2018

## REFERENCES

- Bagetta, V., Picconi, B., Marinucci, S., Sgobio, C., Pendolino, V., Ghiglieri, V., Fusco, F.R., Giampà, C., and Calabresi, P. (2011). Dopamine-dependent long-term depression is expressed in striatal spiny neurons of both direct and indirect pathways: implications for Parkinson's disease. *J. Neurosci.* 31, 12513–12522.
- Bagetta, V., Sgobio, C., Pendolino, V., Del Papa, G., Tozzi, A., Ghiglieri, V., Giampà, C., Zianni, E., Gardoni, F., Calabresi, P., and Picconi, B. (2012). Rebalance of striatal NMDA/AMPA receptor ratio underlies the reduced emergence of dyskinesia during D2-like dopamine agonist treatment in experimental Parkinson's disease. *J. Neurosci.* 32, 17921–17931.
- Beck, G., Singh, A., and Papa, S.M. (2017). Dysregulation of striatal projection neurons in Parkinson's disease. *J. Neural Transm. (Vienna)*, Published online June 15, 2017. <https://doi.org/10.1007/s00702-017-1744-5>.
- Borgkvist, A., Avegno, E.M., Wong, M.Y., Kheirbek, M.A., Sonders, M.S., Hen, R., and Sulzer, D. (2015). Loss of striatonigral GABAergic presynaptic inhibition enables motor sensitization in parkinsonian mice. *Neuron* 87, 976–988.
- Bravi, D., Mouradian, M.M., Roberts, J.W., Davis, T.L., Sohn, Y.H., and Chase, T.N. (1994). Wearing-off fluctuations in Parkinson's disease: contribution of postsynaptic mechanisms. *Ann. Neurol.* 36, 27–31.
- Calabresi, P., Picconi, B., Tozzi, A., Ghiglieri, V., and Di Filippo, M. (2014). Direct and indirect pathways of basal ganglia: a critical reappraisal. *Nat. Neurosci.* 17, 1022–1030.
- Clements, J.D., Lester, R.A., Tong, G., Jahr, C.E., and Westbrook, G.L. (1992). The time course of glutamate in the synaptic cleft. *Science* 258, 1498–1501.
- Cui, G., Jun, S.B., Jin, X., Pham, M.D., Vogel, S.S., Lovinger, D.M., and Costa, R.M. (2013). Concurrent activation of striatal direct and indirect pathways during action initiation. *Nature* 494, 238–242.
- Day, M., Wang, Z., Ding, J., An, X., Ingham, C.A., Shering, A.F., Wokosin, D., Iljic, E., Sun, Z., Sampson, A.R., et al. (2006). Selective elimination of glutamatergic synapses on striatopallidal neurons in Parkinson disease models. *Nat. Neurosci.* 9, 251–259.
- Deffains, M., Iskhakova, L., Katabi, S., Haber, S.N., Israel, Z., and Bergman, H. (2016). Subthalamic, not striatal, activity correlates with basal ganglia downstream activity in normal and parkinsonian monkeys. *eLife* 5, 5.
- Fieblinger, T., Graves, S.M., Sebel, L.E., Alcacer, C., Plotkin, J.L., Gertler, T.S., Chan, C.S., Heiman, M., Greengard, P., Cenci, M.A., and Surmeier, D.J. (2014). Cell type-specific plasticity of striatal projection neurons in parkinsonism and L-DOPA-induced dyskinesia. *Nat. Commun.* 5, 5316.
- Freeze, B.S., Kravitz, A.V., Hammack, N., Berke, J.D., and Kreitzer, A.C. (2013). Control of basal ganglia output by direct and indirect pathway projection neurons. *J. Neurosci.* 33, 18531–18539.
- Gerfen, C.R., and Surmeier, D.J. (2011). Modulation of striatal projection systems by dopamine. *Annu. Rev. Neurosci.* 34, 441–466.
- Gubellini, P., Picconi, B., Bari, M., Battista, N., Calabresi, P., Centonze, D., Bernardi, G., Finazzi-Agrò, A., and Maccarrone, M. (2002). Experimental parkinsonism alters endocannabinoid degradation: implications for striatal glutamatergic transmission. *J. Neurosci.* 22, 6900–6907.
- Hallett, P.J., Dunah, A.W., Ravenscroft, P., Zhou, S., Bezard, E., Crossman, A.R., Brotchie, J.M., and Standaert, D.G. (2005). Alterations of striatal NMDA receptor subunits associated with the development of dyskinesia in the MPTP-lesioned primate model of Parkinson's disease. *Neuropharmacology* 48, 503–516.
- Hosokawa, T., Mitsushima, D., Kaneko, R., and Hayashi, Y. (2015). Stoichiometry and phosphoisotypes of hippocampal AMPA-type glutamate receptor phosphorylation. *Neuron* 85, 60–67.
- Huganir, R.L., and Nicoll, R.A. (2013). AMPARs and synaptic plasticity: the last 25 years. *Neuron* 80, 704–717.
- Ingham, C.A., Hood, S.H., Taggart, P., and Arbuthnott, G.W. (1998). Plasticity of synapses in the rat neostriatum after unilateral lesion of the nigrostriatal dopaminergic pathway. *J. Neurosci.* 18, 4732–4743.
- Jenkins, M.A., Wells, G., Bachman, J., Snyder, J.P., Jenkins, A., Huganir, R.L., Oswald, R.E., and Traynelis, S.F. (2014). Regulation of GluA1  $\alpha$ -amino-3-hydroxy-5-methyl-4-isoxazolepropionic acid receptor function by protein kinase C at serine-818 and threonine-840. *Mol. Pharmacol.* 85, 618–629.
- Kravitz, A.V., Freeze, B.S., Parker, P.R., Kay, K., Thwin, M.T., Deisseroth, K., and Kreitzer, A.C. (2010). Regulation of parkinsonian motor behaviours by optogenetic control of basal ganglia circuitry. *Nature* 466, 622–626.
- Kristensen, A.S., Jenkins, M.A., Banke, T.G., Schousboe, A., Makino, Y., Johnson, R.C., Huganir, R., and Traynelis, S.F. (2011). Mechanism of Ca<sup>2+</sup>/calmodulin-dependent kinase II regulation of AMPA receptor gating. *Nat. Neurosci.* 14, 727–735.
- Lang, A.E., and Lozano, A.M. (1998). Parkinson's disease. First of two parts. *N. Engl. J. Med.* 339, 1044–1053.
- Liang, L., DeLong, M.R., and Papa, S.M. (2008). Inversion of dopamine responses in striatal medium spiny neurons and involuntary movements. *J. Neurosci.* 28, 7537–7547.
- Logan, S.M., Partridge, J.G., Matta, J.A., Buonanno, A., and Vicini, S. (2007). Long-lasting NMDA receptor-mediated EPSCs in mouse striatal medium spiny neurons. *J. Neurophysiol.* 98, 2693–2704.
- Löschmann, P.A., Lange, K.W., Kunow, M., Rettig, K.J., Jähnig, P., Honoré, T., Turski, L., Wachtel, H., Jenner, P., and Marsden, C.D. (1991). Synergism of the AMPA-antagonist NBQX and the NMDA-antagonist CPP with L-dopa in models of Parkinson's disease. *J. Neural Transm. Park. Dis. Dement. Sect. 3*, 203–213.
- Mallet, N., Ballion, B., Le Moine, C., and Gonon, F. (2006). Cortical inputs and GABA interneurons imbalance projection neurons in the striatum of parkinsonian rats. *J. Neurosci.* 26, 3875–3884.
- Mellone, M., Stanic, J., Hernandez, L.F., Iglesias, E., Zianni, E., Longhi, A., Prigent, A., Picconi, B., Calabresi, P., Hirsch, E.C., et al. (2015). NMDA receptor GluN2A/GluN2B subunit ratio as synaptic trait of levodopa-induced dyskinesias: from experimental models to patients. *Front. Cell. Neurosci.* 9, 245.
- Meurers, B.H., Dziejczapolski, G., Shi, T., Bittner, A., Kamme, F., and Shults, C.W. (2009). Dopamine depletion induces distinct compensatory gene expression changes in DARPP-32 signal transduction cascades of striatonigral and striatopallidal neurons. *J. Neurosci.* 29, 6828–6839.
- Nutt, J.G., Obeso, J.A., and Stocchi, F. (2000). Continuous dopamine-receptor stimulation in advanced Parkinson's disease. *Trends Neurosci.* 23 (10, Suppl), S109–S115.
- Obeso, J.A., Olanow, C.W., and Nutt, J.G. (2000). Levodopa motor complications in Parkinson's disease. *Trends Neurosci.* 23 (10, Suppl), S2–S7.
- Oertel, W., Eggert, K., Pahwa, R., Tanner, C.M., Hauser, R.A., Trenkwalder, C., Ehret, R., Azulay, J.P., Isaacson, S., Felt, L., et al. (2017). Randomized, placebo-controlled trial of ADS-5102 (amantadine) extended-release capsules for levodopa-induced dyskinesia in Parkinson's disease (EASE LID 3). *Mov. Disord.* 32, 1701–1709.
- Pailé, V., Picconi, B., Bagetta, V., Ghiglieri, V., Sgobio, C., Di Filippo, M., Viscomi, M.T., Giampà, C., Fusco, F.R., Gardoni, F., et al. (2010). Distinct levels of dopamine denervation differentially alter striatal synaptic plasticity and NMDA receptor subunit composition. *J. Neurosci.* 30, 14182–14193.
- Papa, S.M., and Chase, T.N. (1996). Levodopa-induced dyskinesias improved by a glutamate antagonist in Parkinsonian monkeys. *Ann. Neurol.* 39, 574–578.
- Parker, P.R., Lalive, A.L., and Kreitzer, A.C. (2016). Pathway-specific remodeling of thalamostriatal synapses in parkinsonian mice. *Neuron* 89, 734–740.

- Picconi, B., Centonze, D., Håkansson, K., Bernardi, G., Greengard, P., Fisone, G., Cenci, M.A., and Calabresi, P. (2003). Loss of bidirectional striatal synaptic plasticity in L-DOPA-induced dyskinesia. *Nat. Neurosci.* 6, 501–506.
- Potts, L.F., Wu, H., Singh, A., Marcilla, I., Luquin, M.R., and Papa, S.M. (2014). Modeling Parkinson's disease in monkeys for translational studies, a critical analysis. *Exp. Neurol.* 256, 133–143.
- Sanftner, L.M., Sommer, J.M., Suzuki, B.M., Smith, P.H., Vijay, S., Vargas, J.A., Forsayeth, J.R., Cunningham, J., Bankiewicz, K.S., Kao, H., et al. (2005). AAV2-mediated gene delivery to monkey putamen: evaluation of an infusion device and delivery parameters. *Exp. Neurol.* 194, 476–483.
- Savtchenko, L.P., and Rusakov, D.A. (2005). Extracellular diffusivity determines contribution of high-versus low-affinity receptors to neural signaling. *Neuroimage* 25, 101–111.
- Shen, W., Flajolet, M., Greengard, P., and Surmeier, D.J. (2008). Dichotomous dopaminergic control of striatal synaptic plasticity. *Science* 321, 848–851.
- Singh, A., Liang, L., Kaneoke, Y., Cao, X., and Papa, S.M. (2015). Dopamine regulates distinctively the activity patterns of striatal output neurons in advanced parkinsonian primates. *J. Neurophysiol.* 113, 1533–1544.
- Singh, A., Mewes, K., Gross, R.E., DeLong, M.R., Obeso, J.A., and Papa, S.M. (2016). Human striatal recordings reveal abnormal discharge of projection neurons in Parkinson's disease. *Proc. Natl. Acad. Sci. U S A* 113, 9629–9634.
- Surmeier, D.J., Graves, S.M., and Shen, W. (2014). Dopaminergic modulation of striatal networks in health and Parkinson's disease. *Curr. Opin. Neurobiol.* 29, 109–117.
- Tecuapetla, F., Matias, S., Dugue, G.P., Mainen, Z.F., and Costa, R.M. (2014). Balanced activity in basal ganglia projection pathways is critical for contraversive movements. *Nat. Commun.* 5, 4315.
- Tseng, K.Y., Kasanetz, F., Kargieman, L., Riquelme, L.A., and Murer, M.G. (2001). Cortical slow oscillatory activity is reflected in the membrane potential and spike trains of striatal neurons in rats with chronic nigrostriatal lesions. *J. Neurosci.* 21, 6430–6439.
- Turrigiano, G.G. (2008). The self-tuning neuron: synaptic scaling of excitatory synapses. *Cell* 135, 422–435.
- Villalba, R.M., and Smith, Y. (2017). Loss and remodeling of striatal dendritic spines in Parkinson's disease: from homeostasis to maladaptive plasticity? *J. Neural Transm. (Vienna)*, Published online May 24, 2017. <https://doi.org/10.1007/s00702-017-1735-6>.
- Yin, D., Valles, F.E., Fiandaca, M.S., Forsayeth, J., Larson, P., Starr, P., and Bankiewicz, K.S. (2009). Striatal volume differences between non-human and human primates. *J. Neurosci. Methods* 176, 200–205.
- Zhang, X., and Chergui, K. (2015). Dopamine depletion of the striatum causes a cell-type specific reorganization of GluN2B- and GluN2D-containing NMDA receptors. *Neuropharmacology* 92, 108–115.
- Zheng, K., Scimemi, A., and Rusakov, D.A. (2008). Receptor actions of synaptically released glutamate: the role of transporters on the scale from nanometers to microns. *Biophys. J.* 95, 4584–4596.

**Cell Reports, Volume 22**

**Supplemental Information**

**Glutamatergic Tuning of Hyperactive Striatal  
Projection Neurons Controls the Motor Response  
to Dopamine Replacement in Parkinsonian Primates**

**Arun Singh, Meagan A. Jenkins, Kenneth J. Burke Jr., Goichi Beck, Andrew  
Jenkins, Annalisa Scimemi, Stephen F. Traynelis, and Stella M. Papa**

Supplemental Information

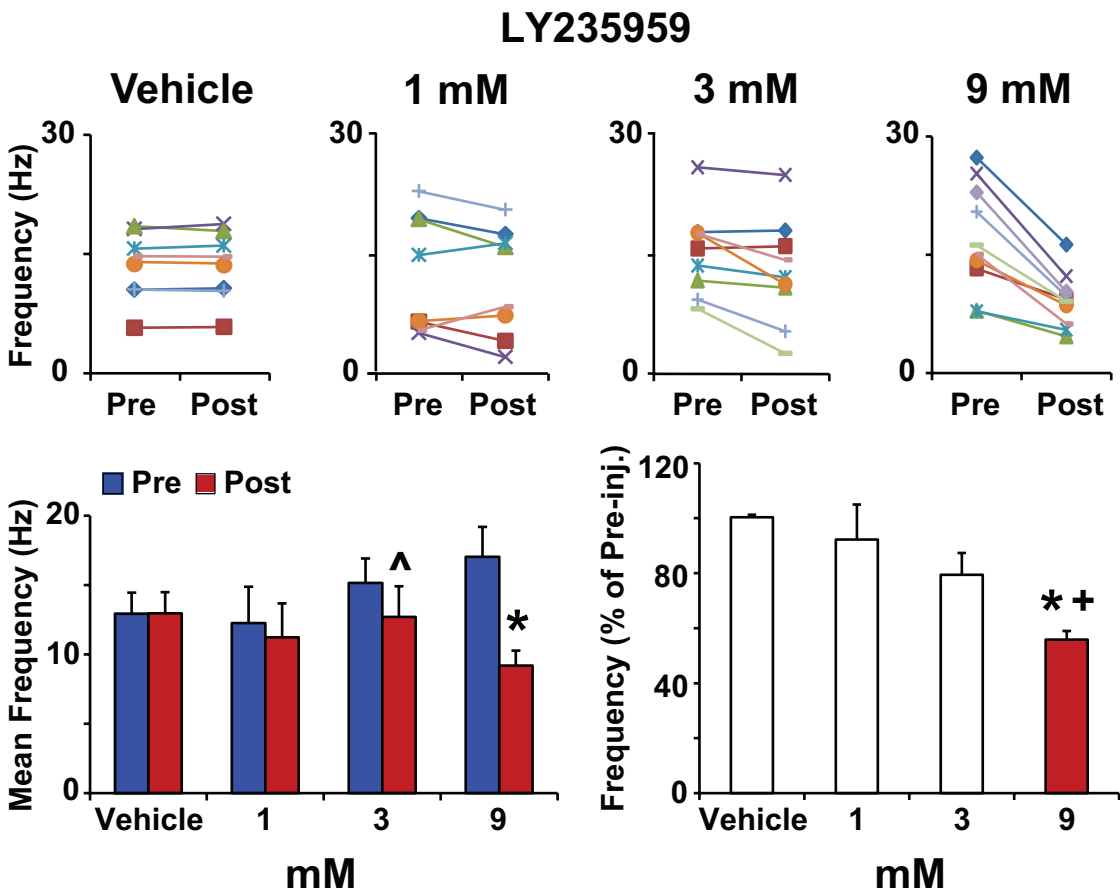

**Figure S1. NMDAR antagonist (LY235959) tests of putamenal injection in parkinsonian primates to determine the dose-response relationship for reduction of SPN activity. Related to Figure 2**

Top: Firing frequency changes of SPNs from baseline (Pre) to post-injection of LY235959 (Post) at the site of recording using different concentrations of the antagonist (1, 3 and 9 mM in aCSF solution) compared to control test (0 mM in aCSF; Vehicle). Each line represents the activity of a single SPN (mean firing rates) during 3 min pre-injection and 3 min post-injection.

Bottom: Comparison of different concentrations of LY235959 showed significant activity reductions with 3 and 9 mM (left graph;  $\wedge$ :  $p < 0.05$ , and  $*$ :  $p < 0.001$ ; paired t-tests). The LY235959 concentration that reduced on average the SPN firing frequency by approximately half of the baseline value was 9 mM (right graph;  $*$ :  $p < 0.001$  versus vehicle, and  $+$ :  $p < 0.01$  versus 1 mM; ANOVA followed by Bonferroni's correction). All cells analyzed in each concentration and presented in the top graphs were included in the comparison of concentration effects (35 SPNs,  $n = 5$ , see Table S1). Values are the mean, and error bars indicate SEM.

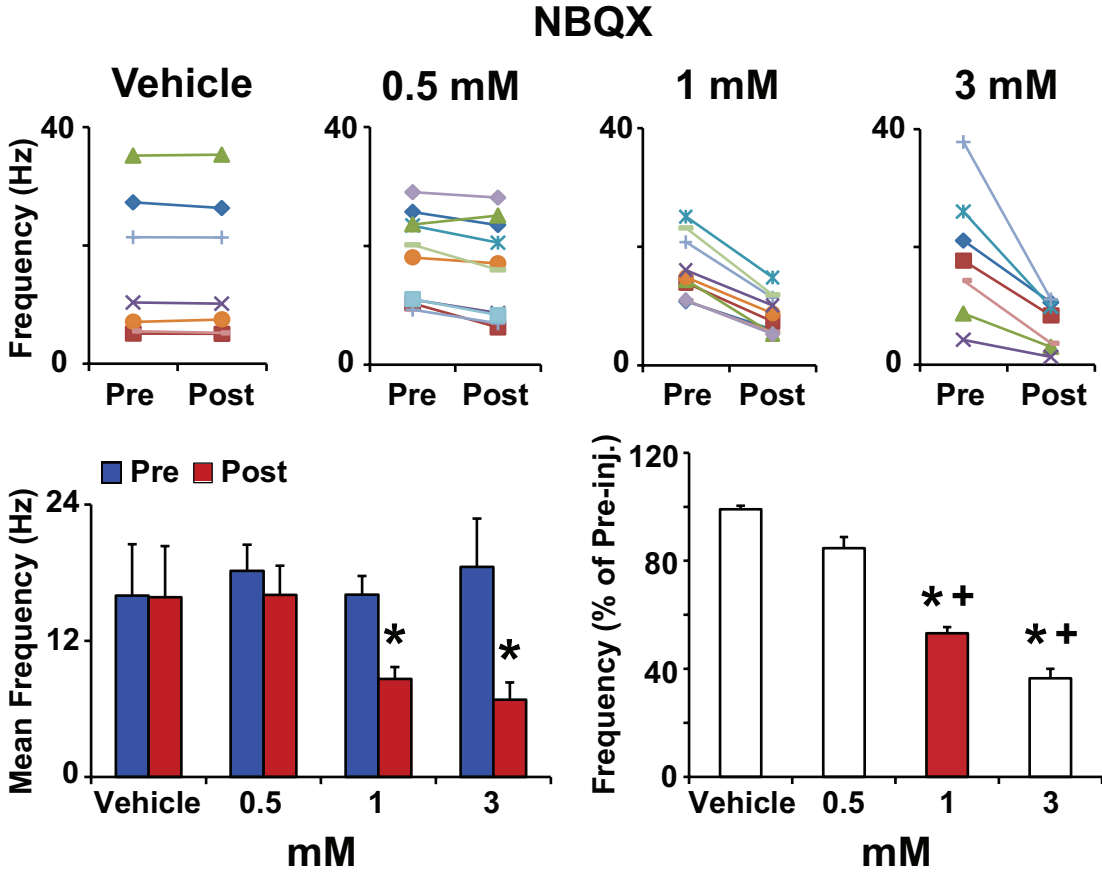

**Figure S2. AMPAR antagonist (NBQX) tests of putamen injection in parkinsonian primates to determine the dose-response relationship for reduction of SPN activity. Related to Figure 3**

Top: Firing frequency changes of SPNs from baseline (Pre) to post-injection of NBQX (Post) at the site of recording using different concentrations (0.5, 1 and 3 mM in aCSF/water solution) compared to control test (0 mM in aCSF/water; Vehicle). Each line represents the activity of a single SPN (mean firing rates) during 3 min pre-injection and 3 min post-injection.

Bottom: Comparison of different concentrations of NBQX showed significant activity reductions with 1 and 3 mM (left graph; \*:  $p < 0.01$ ; paired t-tests). The NBQX concentration that reduced on average the SPN firing frequency by approximately half of the baseline value was 1 mM (right graph; \*:  $p < 0.001$  versus vehicle, and +:  $p < 0.01$  versus 0.5 mM; ANOVA followed by Bonferroni's correction). All cells analyzed in each concentration and presented in the top graphs were included in the comparison of concentration effects (34 SPNs,  $n = 5$ , see Table S1). Values are the mean, and error bars indicate SEM.



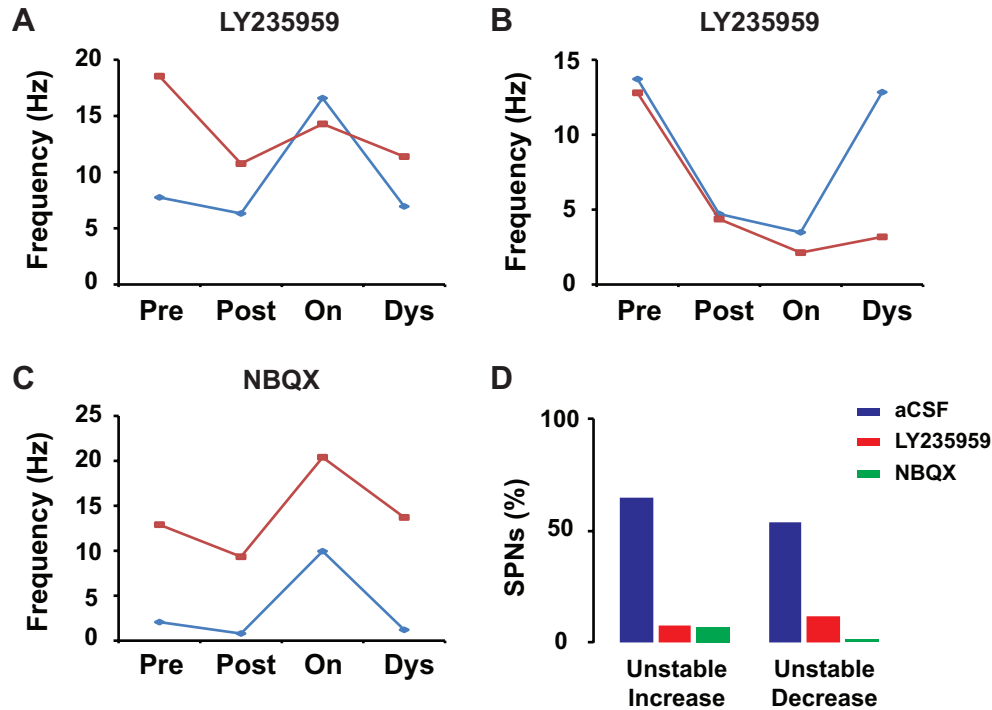

**Figure S3. DA responses following either NMDAR (LY235959) or AMPAR (NBQX) antagonist were rarely unstable. Related to Figures 2, 3, and 4**

(A-C) As in Figures 4 and 5 for the remaining SPNs, the firing frequency changes at baseline (Pre), after injection of LY235959 or NBQX (Post), and subsequently in the transition to motor states “on” and dyskinesias (On and Dys) following the s.c. injection of L-Dopa (each line represents an individual SPN). Note that in these SPNs too the local injection of antagonist significantly reduced the baseline firing frequency, but the antagonist effect did not lead to stable responses to DA. Data correspond to all SPN recordings in all subjects (n=5). Following LY235959 injection, 2 neurons with activity increases (A) and 2 other neurons with decreases (B) during the “on” state had inverted changes during the dyskinesia state. Following NBQX injection, 2 neurons with activity increases (C) during the “on” state had inverted changes during the dyskinesia state.

In each SPN differences between Pre and Post, Post and On, and On and Dys are significant at  $p < 0.01$  (ANOVAs for repeated measure followed by Bonferroni’s corrections). N = 5 primates (see Table S1).

(D) Comparison of the proportion of SPNs that after local injection of aCSF, LY235959, or NBQX exhibited unstable firing frequency increases or decreases during the motor response to dopaminergic stimulation (transition to “on” and dyskinesia states). In control tests of aCSF injection that did not change the baseline activity, more than 50% of total SPNs responded to DA with unstable firing frequency changes. After reduction of baseline activity by LY235959 injection, a total of 9% of SPNs did not stabilize their responses to DA (activity increases or decreases), and after reduction of baseline activity by NBQX injection, a total of 4% of SPNs did not stabilize their responses to DA (only 2 neurons with activity increases in the “on” state). From a total of 117 SPNs including stable and unstable responses to DA, unstable responses were 4 out of 43 in LY235959 tests, 2 out of 45 in NBQX tests, and 17 out of 29 in aCSF tests.

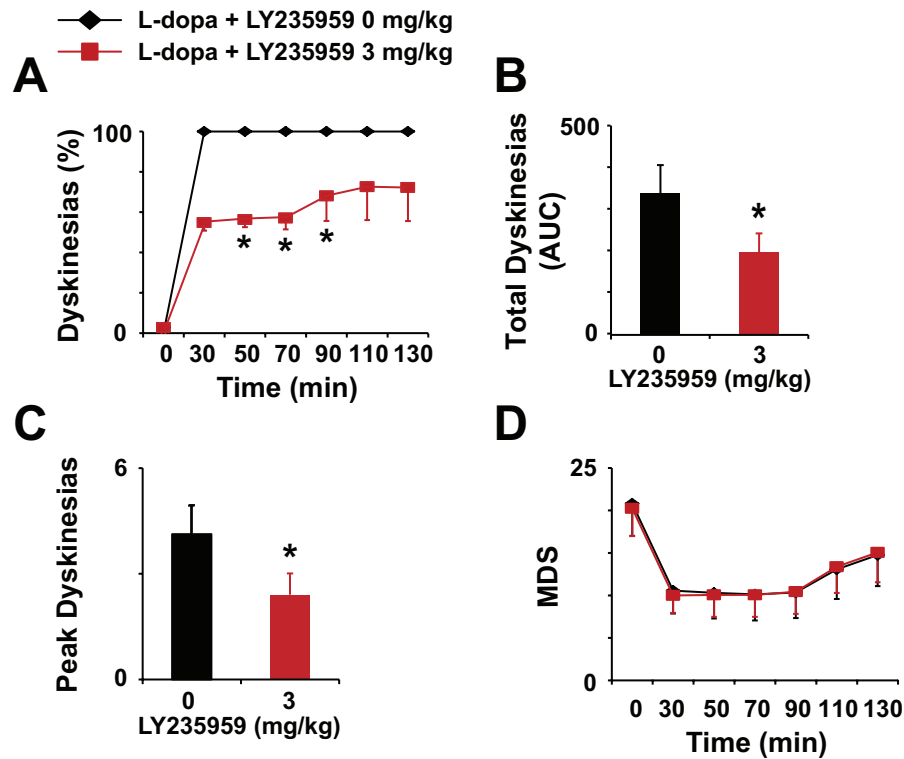

**Figure S4. Systemic administration of the NMDAR antagonist LY235959 reduced dyskinesias induced by L-Dopa in parkinsonian primates. Related to Figure 6**

(A) Time course of dyskinesias induced by s.c. injection of a suboptimal dose of L-Dopa with LY235959 pretreatment. LY235959 injection (3 mg/kg s.c.; red) compared to the control vehicle injection (0 mg/kg s.c., black) reduced dyskinesia scores along the time course of the response. The L-Dopa dose was preselected in each animal individually as a suboptimal dose that induced consistent dyskinesias. L-Dopa was injected 5 min after LY235959 injection. Scores were taken before drug injections (“off” state, time 0), 30 min after L-Dopa injection, and thereafter every 20 min interval until dyskinesias disappear and the mobility was returning to the “off” state. Scores in each animal are the average of 3 tests per treatment (data are presented as percentage of control). \* $p < 0.01$ , two-way ANOVAs for repeated measures followed by Fisher’s LSD test.

(B and C) As in A for total and peak dyskinesias calculated as the area under the curve (AUC) and scores at the 50-min interval, respectively. LY235959 injection reduced total dyskinesia by 42.2% and peak dyskinesia scores by 41.7% on average. \* $p < 0.01$  paired t-test.

(D) Time course of motor disability scores (MDS) that were typically reduced by the suboptimal dose of L-Dopa. Pretreatment with LY235959 3 mg/kg s.c. did not change MDS compared with the control test (LY235959 0 mg/kg s.c.).

N = 5 (see Table S1). Values are the mean, and error bars indicate SEM.

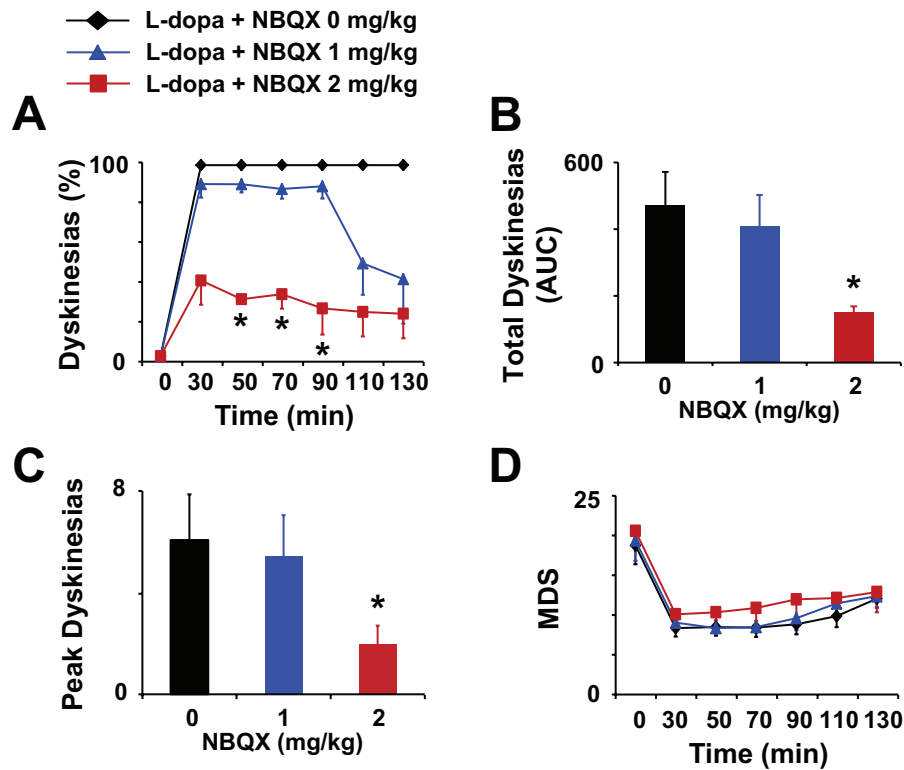

**Figure S5. Systemic administration of the AMPAR antagonist NBQX reduced dyskinesias induced by L-Dopa in parkinsonian primates. Related to Results, Effect of reduced striatal NMDAR signaling on motor responses to L-Dopa in parkinsonian primates. Related to Figure 6**

(A) Time course of dyskinesias induced by s.c. injection of a suboptimal dose of L-Dopa with NBQX pretreatment. NBQX injection (2 mg/kg s.c., red) compared to the control vehicle injection (0 mg/kg s.c., black) reduced dyskinesia scores along the time course of the response. NBQX at 1 mg/kg s.c. had no effect. The L-Dopa dose selection and tests were as in Figure S4. Scores in each animal are the average of 3 tests per treatment (data are presented as percentage of control). \* $p < 0.01$ , two-way ANOVAs for repeated measures followed by Fisher's LSD test.

(B and C) As in A for total and peak dyskinesias calculated as the area under the curve (AUC) and scores at the 50-min interval, respectively. NBQX injection (2 mg/kg s.c.) reduced total dyskinesia by 68.2% and peak dyskinesia scores by 67.7% on average. \* $p < 0.01$ , paired t-test.

(D) Time course of motor disability scores (MDS) that were typically reduced by the suboptimal dose of L-Dopa. Pretreatment with NBQX 1 or 2 mg/kg s.c. did not change MDS compared with the control test (NBQX 0 mg/kg s.c.).

N = 5 (see Table S1). Values are the mean, and error bars indicate SEM.

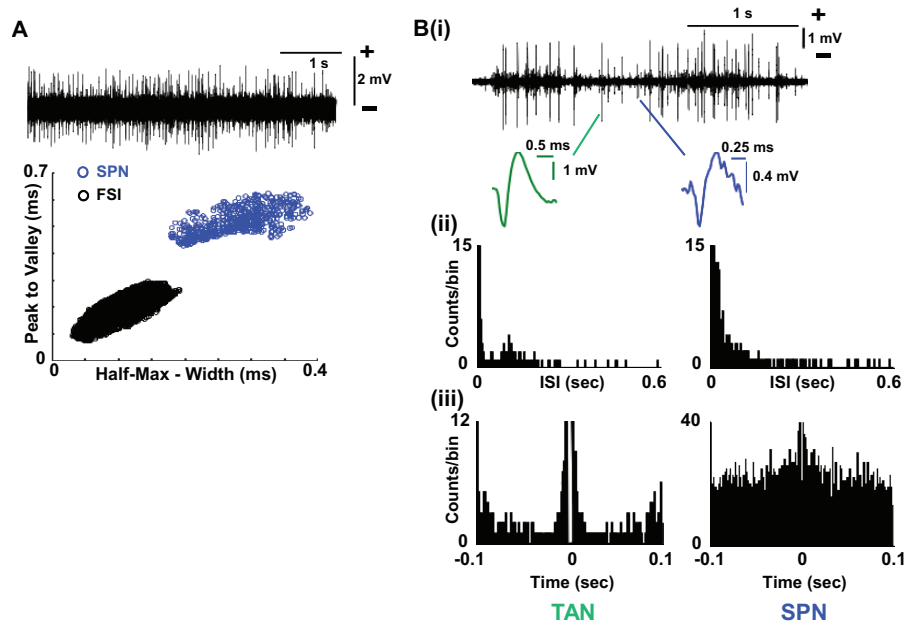

**Figure S6. Classification of SPNs based on waveform parameters and activity criteria. Related to Figures 2 and 3, Figure S1-S3**

(A) Example of single cell recording in the putamen, and the corresponding analysis of waveform parameters in the two clusters discriminated by off-line spike sorting. Depending on peak to valley and half-max width both in msec, one unit was classified as SPN (blue) and the other unit as fast spiking interneurons (FSI, black). Spike sorting by PCA was done with Plexon Offline Sorter (see Supplemental Experimental Procedures).

(B(i)) Example of striatal spike train showing the amplification of extracted waveforms (after offline sorting) that are compatible with TAN (green, waveform duration  $> 1.8$  ms) and SPN (blue, waveform duration 0.9-1.4 ms) units. (ii) ISI histograms of the TAN (left) and SPN (right). Both units have unimodal ISI histogram, but the SPN had the typical high peak close to 0 sec, and large variability of ISIs including some of 1 sec or longer.

(iii) Autocorrelograms (bin width = 0.5 ms) of the TAN (left) and SPN (right). The TAN autocorrelogram is characterized by a central valley. The SPN autocorrelogram was characterized by a central peak.

**Table S1. Subject demographics and characteristics of the primate MPTP model of advanced PD. Related to Figures 2-6, and S1-S5.**

| Subject     | Species<br>(Macaca) | Sex | Age<br>(years) | Weight<br>(kg) | MPTP        |                                   | MDS  | Dys             | Time to<br>Experiment<br>(months) | Chronicity<br>(years) |
|-------------|---------------------|-----|----------------|----------------|-------------|-----------------------------------|------|-----------------|-----------------------------------|-----------------------|
|             |                     |     |                |                | TCD<br>(mg) | Treatment<br>Duration<br>(months) |      |                 |                                   |                       |
| 1 (r, b)    | Mulatta             | F   | 15             | 6.2            | 10.3        | 46                                | 18   | 3.5             | 51                                | 8                     |
| 2 (r, b)    | Mulatta             | F   | 12             | 6              | 40.2        | 72                                | 21   | 3.5             | 7                                 | 7                     |
| 3 (r, b)    | Mulatta             | F   | 8              | 5.1            | 13.7        | 10                                | 21   | 6               | 10                                | 1.5                   |
| 4 (r, i, b) | Mulatta             | F   | 7              | 7.6            | 10.8        | 24                                | 20   | 4.5             | 4                                 | 2.5                   |
| 5 (b)       | Mulatta             | F   | 16             | 10.4           | 11.9        | 43                                | 23.5 | 10 <sup>a</sup> | 48                                | 7.5                   |
| 6 (b)       | Mulatta             | M   | 15             | 10.8           | 8.2         | 77                                | 21.5 | 6 <sup>a</sup>  | 40                                | 9.5                   |
| 7 (i)       | Fascicularis        | M   | 6              | 5.6            | 4.5         | 7                                 | 20.5 | 4.5             | 6                                 | 1                     |
| 8 (r)       | Fascicularis        | M   | 6              | 6.2            | 7.6         | 8                                 | 22   | 4               | 9                                 | 1.5                   |
| 9 (i)       | Fascicularis        | M   | 7              | 6              | 3           | 4                                 | 22.5 | 4.5             | 12                                | 1.5                   |

**Demographics.** Subjects include all macaques used for electrophysiology and behavioral experiments following striatal or systemic drug tests (females and males of adult age ranging from 6 to 16 year old). Age and weight measures correspond to the time of study entry after completion of the model and stabilization of motor impairment. Studies are indicated for each subject by: “r”, recordings; “b”, behavioral tests after systemic drug injections (all subjects used in LY235959 and NBQX tests); and “i”, behavioral tests after antagonist infusion into the putamen.

**MPTP model of advanced PD.** Data include: 1) total cumulative dose (TCD) of MPTP, the sum of all doses (0.1-0.8 mg/kg) given intravenously at variable intervals of 1 week or longer; 2) the duration of MPTP treatment, time since the first to the last injection including variable interruptions with or without L-Dopa treatment according to individual clinical conditions; 3) motor disability scores (MDS), values taken in the “off” state after final suspension of MPTP administration and stabilization of the model (scores above 18 indicate moderate to severe parkinsonism, animals were maintained on daily oral L-Dopa treatment); 4) Scores of L-Dopa-induced dyskinesias (Dys), total “peak dyskinesia scores” taken at one interval of the assessment corresponding to the peak-effect of L-Dopa (50-70 min after s.c. injection of suboptimal doses of L-Dopa individually determined as the dose that could be tolerated by the chaired animal under restraint for electrophysiology, see Experimental Procedures details); 5) time to experiments, the period since completion of the model to the start of electrophysiology or behavioral experiments; 6) chronicity, the sum of “Duration of MPTP treatment” plus “Time to experiments”, representing the total duration of development of the actual parkinsonian state that was present at the time of data collection.

The model development time in these subjects (1 to 9.5 years rounding decimals to nearest 0.5) reflects the pronounced chronicity of their parkinsonism.

<sup>a</sup>: scores taken in freely moving animals in their cages for tests of systemic drug effects.

## Supplemental Experimental Procedures

### In vitro NMDAR and AMPAR blockade

L-Glutamate is rapidly released into the synaptic cleft, and is thought to reach concentrations that approach 1 mM (Clements et al., 1992). To determine the concentrations at which the competitive NMDAR antagonist LY235959 ([3*S*-(3 $\alpha$ ,4 $\alpha$ ,6 $\beta$ ,8 $\alpha$ )]-decahydro-6-(phosphonomethyl)-3-isoquinolinecarboxylic acid, Tocris, Ellisville, USA) can nonselectively inhibit AMPAR currents in response to synaptic concentrations of glutamate (1 mM), we rapidly applied glutamate to HEK cells transiently expressing recombinant GluA1 plus the accessory TARP stargazin while recording the whole cell current response under voltage clamp. LY235959 was pre-applied to the cell for 1 second at varying concentrations, followed by coapplication of glutamate plus LY235959, and the peak AMPAR current response to 1 mM glutamate measured. We also determined the potency for inhibition of the GluA1/stargazin response in HEK cells to similar pre-application of the AMPAR-selective antagonist NBQX (2,3-dioxo-6-nitro-1,2,3,4-tetrahydrobenzo[*f*]quinoxaline-7-sulfonamide, Tocris, Ellisville, USA). The peak response prior to desensitization was taken as an estimate of the peak synaptic response.

A CMV-based mammalian expression vector, pRK5 (BD Pharmingen, San Diego, USA), harbouring the coding sequences of the rat *Grial* gene (GeneBank, gi: 29789268) was used for transient expression of GluA1 in mammalian HEK293 cells. Stargazin was contained within a pCI-neo vector and was co-expressed with GluA1 in HEK293 cells. Cells were grown in Glutamax Dulbecco's modified Eagle's medium (DMEM) in polystyrene culture dishes in a humidified atmosphere of 5% CO<sub>2</sub>, 95% O<sub>2</sub>, at 37°C. All cell culture reagents were from Gibco unless otherwise stated. Growth media were supplemented with 10% (v/v) fetal calf serum, 100 units/ml of penicillin, and 100  $\mu$ g/ml of streptomycin. Cells were split using 0.05% trypsin-EDTA and plated on 8 mm glass coverslips coated with 20  $\mu$ g/ml poly-D-lysine (Millipore, Darmstadt, Germany) contained in 24-well tissue culture. Cells were transfected 24-48 hours prior to experimentation using XTREMEGENE9 (Roche) and subsequently grown in 200  $\mu$ M NBQX to protect transfected cells against excitotoxicity induced by endogenous glutamate in the growth media. Plasmid DNA harboring a reporter cDNA encoding Green Fluorescent Protein was added to receptor DNA to aid in identification of individually transfected cells.

Whole cell current recordings were made at room temperature (23°C) from transfected HEK cells using thin-walled borosilicate micropipettes (World Precision Instruments, Sarasota, USA) with a tip resistance of 4-6 M $\Omega$  pulled with a horizontal puller (Sutter Instrument Co, Novato, CA). Electrodes were filled with an internal solution that contained (in mM) 110 gluconic acid, 110 CsOH, 30 CsCl, 4 NaCl, 5 HEPES, 4.37 EGTA, 2.1 CaCl<sub>2</sub>, 2.27 MgCl<sub>2</sub>, 0.1 spermine (Sigma-Aldrich, St. Louis, Missouri, USA), 4 ATP, 0.3 GTP. The pH was adjusted to 7.3 with CsOH. Cells were perfused continuously with external recording solution for all experiments comprised of (in mM) 150 NaCl, 10 HEPES, 3 KCl, 1 CaCl<sub>2</sub>, 1 MgCl<sub>2</sub>, pH 7.4; 310-330 mOsm. Two 10-channel infusion pumps (KD Scientific, Holliston, MA) and a rapid solution exchanger (RSC160, Bio-Logic, Claix, France) were used to apply agonist and antagonist, dissolved in extracellular solution, at a rate of 2 ml/min. The solution changer was driven by protocols in pClamp 9.2 (Molecular Devices, Sunnyvale, CA), with a solution exchange time of 0.5-1 msec. Whole cell currents from transfected HEK293 cells held at -60 mV were recorded with a MultiClamp 700B amplifier and Digidata 1322A interface (Molecular Devices, Sunnyvale, CA), digitized at 10kHz and filtered at 4 kHz. Data were gathered from at least five cells for each antagonist concentration. A control current response to 1 mM glutamate in the absence of antagonist was recorded from each cell before and after application of a single concentration of LY235959 in the presence of 1 mM glutamate. Analysis of recordings was carried out using Matlab (The Math Works, Inc.). Peak currents (*I*) were fitted by the Hill equation, assuming a maximally effective concentration of NBQX or LY235959 will induce 100% block of the AMPAR currents.

$$I = \frac{I_{max}}{1 + \left(\frac{[antagonist]}{IC_{50}}\right)^{nH}} \quad (\text{Eq. 1})$$

In order to assess antagonist potency at NMDARs, two-electrode voltage-clamp recordings were conducted from *Xenopus laevis* oocytes injected with cRNA encoding both wild-type GluN1 and GluN2A. Injected oocytes were maintained at 17°C in Barth's solution containing gentamycin sulfate (0.1 mg/ml). After 3-4 days, two-electrode voltage-clamp recordings were made at 23°C. Oocytes were continuously perfused in a solution containing (in mM) 90 NaCl, 10 HEPES, 1 KCl, 1 BaCl<sub>2</sub>, 10 EDTA, pH 7.4. Voltage and current recording pipettes were filled with 0.3 and 3 M KCl, respectively, and current responses were recorded at a holding potential of -40 mV. Voltage was maintained with an OC725 Warner Instruments two-electrode voltage-clamp amplifier. Glutamate (1 mM) was used to activate current responses, which were recorded during the application of 1 mM glutamate and 30  $\mu$ M glycine with and without co-application of varying concentrations of LY235959 or NBQX. The degree of inhibition from application of various concentrations of antagonist was calculated as the ratio of the amplitude of the test

response to the control response.

### Simulation of diffusion of antagonist in brain parenchyma

We described the space-time concentration profile of the AMPAR antagonist NBQX (0.5, 1, 3 mM) and the NMDAR antagonist LY235959 (1, 3, 9 mM) pressure-applied into the brain of NHPs using the classic solution of the diffusion equation in an isotropic medium:

$$C(r, t) = \frac{Q}{8(\pi D^* t)^{3/2}} \exp\left(-\frac{r^2}{4D^* t}\right) \quad (\text{Eq. 2})$$

Here,  $Q$  represents the total amount of diffusing substance expressed in moles, calculated as the product of the drug concentration and the injected volume (200 nl) and  $r$  is the distance from the point source in m.  $D^*$  is the apparent diffusion coefficient of the diffusing substance, calculated as  $D^* = \frac{D_{free}}{\lambda^2}$ . In this equation,  $D_{free}$  represents the diffusion coefficient of Alexa Fluor 350 (AF350) in aqueous solution at 37°C (i.e. 0.75  $\mu\text{m}^2/\text{ms}$ ) (Zheng et al., 2008) and  $\lambda$  is the tortuosity of the rat striatum ( $\lambda=1.54$ ) (Rice and Nicholson, 1991). We used the diffusion coefficients of AF350 because its molecular weight (350 Da) is similar to that of NBQX (336.28 Da) and LY235959 (277.26 Da). Accordingly, at 37°C (Zheng et al., 2008),  $D^* = 0.32 \mu\text{m}^2/\text{ms}$ . All simulations were performed using custom-made code written in IgorPro 6.37 (Wavemetrics, Lake Oswego, OR).

### Non-human primate model of PD

Nine adult male and female macaques (*Macaca mulatta and fascicularis*; 5-11 kg body weight) were used in the studies (see Table S1). All procedures followed guidelines of the *National Institutes of Health Guide for the Care and Use of Laboratory Animals* and were approved by the *Institutional Animal Care and Use Committee of Emory University*. A model of chronic, advanced parkinsonism was produced in all animals by systemic administration of 1-methyl-4-phenyl-1,2,3,6-tetrahydropyridine (MPTP) according to previously described techniques (Liang et al., 2008). In brief, intravenous injections of MPTP were repeated weekly until animals developed a stable moderate to severe motor disability (Papa and Chase, 1996), as measured by a standardized Motor Disability Scale for MPTP-treated primates (Cao et al., 2007). Stability of motor impairment was determined by periodic assessments during three months. Animals required a daily L-Dopa regimen to maintain good health conditions (Sinemet®, 100-300 mg/day). This treatment produced a clear and consistent “on” response (reversal of motor disability). Also in these markedly parkinsonian primates, the maintenance treatment led to the development of L-Dopa-induced dyskinesias (typical involuntary choreodystonic movements) in a variable period from 2-3 weeks to 4 months. Dyskinesias were scored in Part II of the standardized Motor Disability Scale for MPTP-treated primates (Potts et al., 2015). After the model was complete and animals developed dyskinesias, the response to a range of subcutaneous (s.c.) doses of L-Dopa methyl ester plus benserazide (Sigma-Aldrich Corporation, St. Louis, MO, USA) dissolved in saline was tested in each animal to determine the effective dose for use in recording experiments. In every animal, the dose of L-Dopa/benserazide that elicited a clear “on” state with peak-dose dyskinesias producing a distinct dyskinesia state but compatible with restraint in the primate chair during recordings was selected (Singh et al., 2015).

### Electrophysiology in parkinsonian primates

In preparation for recordings, 5 animals were surgically implanted with recording chambers and head restraining devices (Papa et al., 1999). After a period of recovery from surgery, the striatal regions were identified following standard methods for electrophysiological mapping of basal ganglia in all animals. The activity of single striatal cells in the sensorimotor putamen (posterolateral areas) was recorded in alert animals with tungsten microelectrodes (FHC, Inc. customized microelectrodes original impedance 2-4 M $\Omega$  at 1 kHz, reconditioned to 0.1-0.3 M $\Omega$  to improve the isolation of SPNs). Electrodes were lowered to the target area through an electronically controlled microdrive (NAN Instruments, LTD). Signals were amplified and band-pass filtered at 0.1-8 kHz (sampling frequency = 30-40 kHz; Plexon, Inc, Dallas, Texas and Blackrock Microsystems LLC, Salt Lake City, UT, USA). Oral maintenance L-Dopa/carbidopa (Sinemet®) was withdrawn the day of the recording experiment. Typical firing patterns of tonically active cholinergic interneurons and fast-spiking GABAergic interneurons that could be recognized online by their waveform were excluded, and the search for units compatible with SPNs continued for data collection in the “off” state, and then proceeding with the experiment. Units compatible with SPN were not discriminated based on the baseline frequency (the final classification of units was always performed with offline analysis, see below). In fact, in this group of animals the baseline firing frequency of SPNs are lower than previously reported (Singh et al., 2015; Singh et al., 2016). From all SPNs recorded in dose selection (Figures S1 and S2) and complete L-Dopa experiments (Figures 2 and 3), the baseline firing frequencies were  $13 \pm 1$  Hz,  $15 \pm 1$  Hz, and  $16 \pm 1$  Hz, ( $p > 0.05$ , mean  $\pm$  SEM) as grouped by the subsequent aCSF, LY23559 or NBQX injections,

respectively. Likely, the reason for these lower frequencies compared with the usual > 20 Hz is the inclusion of animals with more moderate parkinsonism. As shown in Table S1, motor disability scores vary across the animals within the range for moderate to severe disability, but all animals met the criteria for a chronic, advanced model of parkinsonism, and had pathological SPN hyperactivity with some neurons with the typical high firing rates and unstable responses to DA. Thus, in each experiment, single units with activity compatible with SPNs (Singh et al., 2015; Singh et al., 2016) were isolated and monitored for several minutes before recording the baseline segment and proceeding with the complete experiment collecting data at the designated time points for each segment of the experiment (see below).

All animals used in electrophysiology experiments were euthanized at the end of the study, and the guide cannula tracks from the last experiments on days before euthanasia were visualized in the brain (Figure 1F). The electrode trajectories were then reconstructed according to the guide cannula track and the used positioning coordinates in the recording chamber, allowing us to verify recordings in the targeted striatal areas (Liang et al., 2008; Papa et al., 1999).

### **Striatal NMDAR or AMPAR blockade**

To deliver the NMDAR or AMPAR antagonist at the site of neuronal recording, the electrodes were inserted in “injectrodes” (Alpha Omega, Inc., Alpharetta, GA), which consist of a thin needle connected to a tubing system and a microinjection pump (Harvard Apparatus, MA, USA). The antagonist solution was injected in a volume of 200 nl at a rate of 1  $\mu$ l/min. LY235959 was dissolved in aCSF and NBQX in aCSF/water. The tip of the electrode was placed at a fixed distance from the tip of the cannula (400  $\mu$ m; Figure 1C). The injectrode was lowered with the same microdrive (NAN Instruments, LTD) used for mapping.

The effective concentration of the antagonist (within the limits set from *in vitro* tests and simulations to maintain selective doses at the synapses) needed to reduce activity of the recorded cells by about 50% was assessed in a series of experiments using different drug concentrations for analysis of effects on basal neuronal activity. We tested the following concentrations: 0, 1.0, 3.0, and 9.0 mM of LY235959, and 0, 0.5, 1.0, and 3.0 mM of NBQX. The antagonist at a given concentration was injected at the recording site after collecting baseline data (pre-application) for at least 3 minutes. The local microinjection of 200 nl of a dose of LY235959, or NBQX was performed, and after 3 minutes the neuronal response was recorded again for 3 minutes (post-application). A total of 69 SPNs were analyzed (see unit classification and data analysis below), 27 SPNs for each antagonist, in addition to 8 and 7 SPNs for the vehicle (0 mM) of LY235959 and NBQX, respectively.

### **Single cell recording through the transition to motor states with DA stimulation**

In complete experiments to determine the effects of reduced glutamatergic signaling on the SPN responses to DA inputs, the selected concentration of NMDAR or AMPAR antagonist (or the same volume of aCSF alone as control test) was injected locally, and followed by s.c. L-Dopa injection at the predetermined dose (see above). As described in Figure 1G, recordings began with isolation of SPNs and data collection for the “pre-application” period (3 min), followed by antagonist injection at the site of recording. After local injection, 3 min were allowed for drug diffusion, and then, data were collected again for 3 min for the “post-application” period. L-Dopa was injected immediately after “post-application” data collection, and the isolated SPN was continuously recorded while monitoring the animal’s behavior using a video camera. Behavioral changes indicated the animal’s passing to the “on” state. In particular, free limb movements in the primate chair with head restraint for neural recordings allowed clear recognition of those changes. The onset of the “on” state began approximately 15 minutes after the s.c. injection of L-Dopa. Rapid movements of the eyes, increased blinking, occasional yawning, and limb stretching were typically observed at the onset of the “on” state. After recognition of clear behavioral changes, and after the animal relaxed, the SPN activity was collected again for 3 minutes corresponding to the “on” state (~20 min after L-Dopa injection). The dyskinesia state usually developed 10-20 minutes after turning “on” and was indicated by the presence of typical movements unique to each animal but most commonly choreiform and dystonic movements of the legs and arms. After clear dyskinesias were observed, the SPN activity was collected again for 3 minutes for the dyskinesia state (~40 min after L-Dopa injection). The timing for data collection corresponding to the “on” and dyskinesia states slightly varied across animals and was guided by behavioral changes. The stored segments always were  $\geq$  3 min but not as long to overlap with the next state segment. If the baseline activity was held throughout the total duration of the experiment, the offline analysis yielded 1 or 2 units per experiment. A total of 117 SPNs were analyzed in complete experiments of DA responses (see unit classification and data analysis below), 88 SPNs for antagonists, and 29 SPNs for vehicle control tests.

### **Electrophysiology data analysis**



Electrophysiology data were analyzed first with offline spike-sorting of each recording segment separately using principal component analysis (PCA), and thus discriminating spontaneously active neurons (Plexon Offline Sorter, Plexon Inc, Dallas, Texas, USA). After sorting, specific waveform parameters (duration of peak to valley and half-max width) in the clusters were applied to classify units. This analysis can differentiate SPNs, tonically active neurons (TAN) and fast spiking (FSI) interneurons (Figure S6A) (Gage et al., 2010; Mallet et al., 2005; Singh et al., 2016). In addition, we applied the established criteria for striatal unit classification according to activity parameters, i.e.: (i) waveform, (ii) firing frequency, (iii) ISI histogram, and (iv) autocorrelogram (Figure S6B). The numerical cutoffs for SPN classification were (firing frequency was the study variable, and thus, it was not used): waveform of short duration (0.9–1.4 ms), variable/ irregular spiking with unimodal ISI histogram (peak close to 0 ms and large variation of ISIs including long intervals of  $\geq 1$  s), and a central peak or “narrow” central valley in autocorrelograms (Barnes et al., 2005). TANs classification included: bi- or multiphasic waveform of long duration ( $> 1.8$  ms), 2–15 Hz firing frequency, tonic activity with unimodal or “bimodal” ISI histogram, and a “wide” central valley in autocorrelograms (Barnes et al., 2005; Raz et al., 1996). FSIs classification included: small and short waveform ( $< 0.9$  ms), higher firing frequency ( $> 18$  Hz) with or without bursts, unimodal ISI histogram without intervals  $> 1$  s, and a central peak in autocorrelograms (Gage et al., 2010; Mallet et al., 2005). Units classified as TANs and FSIs or unclassified units (ambiguous parameters) were excluded from further analysis.

Classified SPNs at baseline (“off” state, pre-local application) were followed in subsequent segments of the experiment for comparison, verifying consistency of cell isolation through all segments of the recording. Units found to be present initially but lost in subsequent recording segments (usually due to movement) were excluded from analysis. If the baseline activity was held throughout the total duration of the experiment, data collection yielded 1 or 2 units per experiment.

The obtained sorted and classified data were then minimally post-processed using Neuroexplorer (Nex Technologies, Madison, AL, USA) and Matlab (MathWorks, Natick, MA, USA) software. Spike trains for each segment (180 seconds at a minimum) were analyzed for firing frequencies binned at 1 second. Mean frequencies of the unit in the pre-application, post-application, “on”, and dyskinesia states were compared. Paired t-tests were used to compare only two segments (pre and post application in screening of antagonist concentration). One-way ANOVAs for repeated measures followed by the *post-hoc* Bonferroni’s test when the  $F$  value was significant ( $p < 0.01$ ) were used to compare four segments in complete experiments with local antagonist application followed by s.c. L-Dopa injection. In all SPNs, local application of antagonists at the used concentration induced statistically significant changes of firing rate (post application changes). SPNs with significantly increased or decreased firing frequency in the “on” state (“Post” vs. “On”;  $p < 0.01$ ) were separated accordingly, i.e.: increase or decrease response. Only two cells with no significant firing rate change in the “on” state ( $p > 0.05$ ) were excluded from further analysis. We did not use a predetermined threshold of change in the “on” state for inclusion, which would be arbitrary; instead, we included all units with changes that were statistically significant. In each SPN, frequency changes in the dyskinesia state determined if the increased or decreased firing rate in the “on” state was stable or not. Unstable responses were defined by statistically significant ( $p < 0.05$ ) firing rate changes in the dyskinesia state in the opposite direction to the changes developed in the onset of the “on” state. Subsequently, the activity changes in the “on” and dyskinesia states were analyzed for their relationship to the reduced firing frequency after the local application of LY235959 or NBQX with the regression equation, where we used the ratio of frequency after the local antagonist injection ( $F_{Antagonist}$ ) to the frequency at baseline ( $F_{Baseline}$ ) as the predictor of the ratio of frequency after L-Dopa injection either in the “on” or dyskinesia state ( $F_{Dopamine}$ ) to  $F_{Antagonist}$  (i.e., the frequency in the “off” state after local antagonist injection just before L-Dopa injection).

$$\frac{F_{Dopamine}}{F_{Antagonist}} = \beta \frac{F_{Antagonist}}{F_{Baseline}} + \alpha \quad (\text{Eq. 3})$$

### Striatal infusion of antagonist

To determine the effects of the striatal NMDAR blockade on motor responses to L-Dopa, the antagonist LY235959 was infused covering an extended area of the putamen and the response to s.c. injection of L-Dopa methyl ester plus benserazide was assessed in 3 parkinsonian primates with implanted recording chambers. The volume of infusion was determined according to previous studies of striatal injections (Sanftner et al., 2005; Yasuda et al., 2007), and the corresponding volume reduction to target only the smaller posterolateral and dorsal region of the putamen and avoid overflow onto the surrounding extra-striatal areas. Volumes of 50  $\mu\text{l}$  have been shown to produce a large distribution over the whole striatum, and thus, we calculated a fifth of that volume (10  $\mu\text{l}$ ) for our target area. The concentration of the antagonist solution was the same used in local injections for recording experiments. LY235959 (9 mM) was dissolved in aCSF, and 10  $\mu\text{l}$  of the solution was infused unilaterally into the posterolateral putamen in each animal. The total infusion volume was distributed between five sites (2  $\mu\text{l}/\text{site}$ ) to cover the intended

sensorimotor putamenal region. The hemisphere contralateral to the animal's most prominent dyskinesias was selected for the infusion. Due to the invasiveness of the procedure, each animal could only receive two infusions, one infusion of LY235959 and another infusion of vehicle alone (aCSF 10  $\mu$ l) as control. The solution was injected using the same needle-tubing system used for injections in electrophysiology experiments (Alpha Omega, Inc. Alpharetta, GA). The needle was descended into the chamber and the brain using the same microdrive used for recordings (NAN Instruments, LTD). The needle-tubing system was connected to a pump (Harvard Apparatus, MA, USA) for infusion at a rate of 0.33  $\mu$ l/min. The needle was left in place for 5 minutes following the injection to allow diffusion. Ten minutes following the completion of putamenal infusion in five sites, the animal received the s.c. injection of L-Dopa. The dose of L-Dopa was predetermined in each animal as the dose that elicited a clear suboptimal "on" response, which is defined as a reduction of motor disability scores (MDS) between 75% and 50% with consistent dyskinesias (Cao et al., 2007). After L-Dopa injection, the animal was transferred to the testing cage for continued motor assessment. Scores were taken before infusion (time 0, "off" state) and 30 min after L-Dopa injection and thereafter every 20 minutes for the following 2.5 hr using the standardized motor disability scale parts 1 (MDS) and 2 (dyskinesias) (see above). Videotapes were also taken for deferred blinded scoring.

### **Systemic administration of NMDAR and AMPAR antagonists**

The anti-dyskinetic effects of LY235959 or NBQX with systemic administration were tested in a total of 5 animals that included the animals used for intrastriatal injections. Subcutaneous doses were selected according to previous studies as 3 mg/kg of LY235959 (Papa and Chase, 1996) and 1 to 2 mg/kg of NBQX (Loschmann et al., 1991). Both LY235959 and NBQX were dissolved in saline for systemic injections. Animals were tested after overnight fast and withdrawal of their regular oral L-Dopa treatment (Sinemet®). On testing days, each animal received either vehicle, or the LY235959 or NBQX dose 5 min before the administration of L-Dopa methyl ester plus benserazide. The predetermined subcutaneous dose of L-Dopa was the same used for infusion experiments. Treatments of L-Dopa plus LY235959 (0 or 3 mg/kg) or NBQX (0, 1 or 2 mg/kg) were repeated (3 tests of each treatment) at intervals of 48 hours or more for drug washout. Motor behavior was assessed using the standardized scale parts 1 (MDS) and 2 (dyskinesias) (see above) before and after L-Dopa injection (as described above for striatal infusions) for 130 minutes by direct examination. Animals in these tests were also videotaped for deferred scoring. The examiners were blinded to the treatment, and effects were compared using the average scores from 3 tests of each treatment.

### **Behavioral data analysis**

Behavioral responses were graded within wide ranges and values included none integer, thus composing quantitative variables, which were suitable for analysis with ANOVAs for repeated measures. In all analyses, data distribution and variance homogeneity were examined, and corrective tests were applied as required before accepting the "f" significance in the ANOVA and proceed with post-hoc analysis. In analyses of striatal LY235959 infusion, dyskinesias or MDS changes during the time course of the response were compared with factorial ANOVAs for repeated measures followed by *post-hoc* Fisher's PLSD test (Figures 6A, 6B and 6E), and single dyskinesia values (AUC or peak) between antagonist and aCSF (control) treatments were compared with paired t-tests (Figures 6C and 6D). In analyses of systemic administration of LY235959 and NBQX, ANOVAs or t-tests were also applied using the same method as in the infusion tests (Figures S4 and S5).

### **Supplemental References**

Barnes, T.D., Kubota, Y., Hu, D., Jin, D.Z., and Graybiel, A.M. (2005). Activity of striatal neurons reflects dynamic encoding and recoding of procedural memories. *Nature* 437, 1158-1161.

Cao, X., Liang, L., Hadcock, J.R., Iredale, P.A., Griffith, D.A., Menniti, F.S., Factor, S., Greenamyre, J.T., and Papa, S.M. (2007). Blockade of cannabinoid type 1 receptors augments the antiparkinsonian action of levodopa without affecting dyskinesias in 1-methyl-4-phenyl-1, 2, 3, 6-tetrahydropyridine-treated rhesus monkeys. *J. Pharmacol. Exp. Ther.* 323, 318-326.

Gage, G.J., Stoetzner, C.R., Wiltschko, A.B., and Berke, J.D. (2010). Selective activation of striatal fast-spiking interneurons during choice execution. *Neuron* 67, 466-479.

Mallet, N., Le Moine, C., Charpier, S., and Gonon, F. (2005). Feedforward inhibition of projection neurons by fast-spiking GABA interneurons in the rat striatum in vivo. *J. Neurosci.* 25, 3857-3869.

Papa, S.M., Desimone, R., Fiorani, M., and Oldfield, E.H. (1999). Internal globus pallidus discharge is nearly suppressed during levodopa-induced dyskinesias. *Ann. Neurol.* 46, 732-738.

Potts, L.F., Uthayathas, S., Greven, A.C., Dyavarshetty, B., Mouradian, M.M., and Papa, S.M. (2015). A new quantitative rating scale for dyskinesia in nonhuman primates. *Behav. Pharmacol.* 26, 109-116.

Raz, A., Feingold, A., Zelanskaya, V., Vaadia, E., and Bergman, H. (1996). Neuronal synchronization of tonically active neurons in the striatum of normal and parkinsonian primates. *J. Neurophysiol.* *76*, 2083-2088.

Rice, M.E., and Nicholson, C. (1991). Diffusion characteristics and extracellular volume fraction during normoxia and hypoxia in slices of rat neostriatum. *J. Neurophysiol.* *65*, 264-272.

Yasuda, T., Miyachi, S., Kitagawa, R., Wada, K., Nihira, T., Ren, Y.R., Hirai, Y., Ageyama, N., Terao, K., Shimada, T., *et al.* (2007). Neuronal specificity of alpha-synuclein toxicity and effect of Parkin co-expression in primates. *Neuroscience* *144*, 743-753.
